1  
2  
3  
4  
5  
6  
7  
8  
9  
10  
11  
12  
13  
14  
15  
16  
17  
18  
19  
20  
21  
22  
23

**Western diet increases COVID-19 disease severity in the Syrian hamster**

Julia R. Port<sup>1\*</sup>, Danielle R. Adney<sup>1\*</sup>, Benjamin Schwarz<sup>2</sup>, Jonathan E. Schulz<sup>1</sup>, Daniel E. Sturdevant<sup>3</sup>, Brian J. Smith<sup>4</sup>, Victoria A. Avanzato<sup>1</sup>, Myndi G. Holbrook<sup>1</sup>, Jyothi N. Purushotham<sup>1</sup>, Kaitlin A. Stromberg<sup>2</sup>, Ian Leighton<sup>2</sup>, Catharine M. Bosio<sup>2</sup>, Carl Shaia<sup>4</sup>, Vincent J. Munster<sup>1#</sup>

1. Laboratory of Virology, National Institute of Allergy and Infectious Diseases, National Institutes of Health, Hamilton, MT, USA
2. Laboratory of Bacteriology, National Institute of Allergy and Infectious Diseases, National Institutes of Health, Hamilton, MT, USA
3. Genomics Unit, Research Technologies Branch, National Institute of Allergy and Infectious Diseases, National Institutes of Health, Hamilton, MT, USA
4. Rocky Mountain Veterinary Branch, Division of Intramural Research, National Institutes of Health, Hamilton, MT, USA

\*These authors contributed equally

#Corresponding author: Vincent Munster, email: [vincent.munster@nih.gov](mailto:vincent.munster@nih.gov)

24 **Summary (150 words)**

25 Pre-existing comorbidities such as obesity or metabolic diseases can adversely affect the clinical  
26 outcome of COVID-19. Chronic metabolic disorders are globally on the rise and often  
27 a consequence of an unhealthy diet, referred to as a Western Diet. For the first time in the Syrian  
28 hamster model, we demonstrate the detrimental impact of a continuous high-fat high-sugar diet  
29 on COVID-19 outcome. We observed increased weight loss and lung pathology, such as exudate,  
30 vasculitis, hemorrhage, fibrin, and edema, delayed viral clearance and functional lung recovery,  
31 and prolonged viral shedding. This was accompanied by an increased trend of systemic IL-10  
32 and IL-6, as well as a dysregulated serum lipid response dominated by polyunsaturated fatty acid-  
33 containing phosphatidylethanolamine, recapitulating cytokine and lipid responses associated with  
34 severe human COVID-19. Our data support the hamster model for testing restrictive or targeted  
35 diets and immunomodulatory therapies to mediate the adverse effects of metabolic disease on  
36 COVID-19.

37

38 **Keywords:** Syrian hamster, SARS-CoV-2, obesity, pathogenesis, lipid metabolism

## 39 **Introduction**

40 Severe acute respiratory syndrome coronavirus-2 (SARS-CoV-2) is the etiological agent of  
41 coronavirus disease (COVID)-19 and can cause asymptomatic to severe lower respiratory tract  
42 infections in humans (Nie et al., 2020; Parry et al., 2020). Pre-existing comorbidities such as  
43 immunosuppression, obesity, diabetes, or chronic lung disease can adversely affect the clinical  
44 outcome (Butler and Barrientos, 2020; Hussain et al., 2020; Li et al., 2009; Petrakis et al., 2020).  
45 Of these, obesity and metabolic disorders are global pandemics of rising concern (Araújo et al.,  
46 2019; Saklayen, 2018; Swinburn et al., 2011). The underlying disease is driven mainly by changes  
47 in the global food system, which is producing more processed, affordable, and effectively  
48 marketed food than ever before. This diet, rich in saturated fats and refined sugars, is referred to  
49 as a Western Diet (Cordain et al., 2005). Long-term consumption of a Western Diet may result in  
50 chronic activation of the immune system, impairing both innate and adaptive responses (Green  
51 and Beck, 2017a, b; Rogero and Calder, 2018). The Western Diet has been associated with non-  
52 alcoholic steatohepatitis (NASH) and non-alcoholic fatty liver disease (NAFLD). These disease  
53 syndromes predispose individuals to multiple comorbidities that can include cirrhosis and liver  
54 failure. The relative risk of hospitalization and severe COVID-19 outcome are significantly  
55 increased for patients afflicted by these comorbidities (Butler and Barrientos, 2020). This has  
56 resulted in disproportionately worse outcomes in US ethnic and racial minorities, where  
57 prevalence and incidence of metabolic disorders are increased (Cefalu and Rodgers, 2021).

58 It is currently unclear how certain comorbidities may determine disease manifestation of COVID-  
59 19. Different studies have demonstrated that the Syrian hamster model is suitable to model  
60 aspects of obesity and diabetes and for studying lipid metabolism (Dalbøge et al., 2015; Kasim-  
61 Karakas et al., 1996). In healthy hamsters, SARS-CoV-2 infection is associated with mild to  
62 moderate clinical disease (Chan et al., 2020; Rosenke et al., 2020; Sia et al., 2020). However, no  
63 studies have investigated COVID-19 in hamsters with comorbidities. Here we show in a Syrian  
64 hamster model how a continuous high-fat high-sugar (HFHS) diet changed the metabolomic state

65 in the Syrian hamster and the resulting consequences on viral replication dynamics, immune  
66 protection and disease severity after infection with SARS-CoV-2.

67

## 68 **Results**

### 69 **High-fat and high-sugar diet induces metabolic changes characterized by increased early** 70 **weight gain and glucose tolerance**

71 We investigated the impact of a consistent high-fat and high-sugar (HFHS) diet on the Syrian  
72 hamster. Either a regular rodent (RD) diet or a high-calorimetric HFHS diet was given to male  
73 Syrian hamsters (4-6 week old) for 16 weeks *ad libitum* (N = 35, respectively). Weight gain of  
74 juvenile hamsters was monitored weekly. Initially, animals on the HFHS diet gained weight faster  
75 than animals on the regular diet. Difference in median weights was significant from the 2<sup>nd</sup> week  
76 onwards until week 10 (**Fig 1 A**, N = 35, ordinary two-way ANOVA, followed by Sidak's multiple  
77 comparisons test, p = 0.001, p = <0.001, p =  
78 <0.001, p = 0.0011, p = <0.001). After week 10 weight gain either plateaued or decreased in the  
79 HFHS group (median = 165 g), while in the regular diet group weight increased until week 12  
80 (median = 160 g), at which point the median weight between groups showed no significant  
81 difference. We observed morbidity (4/35 = 11%) in the HFHS group, which was absent in the RD  
82 group.

83 To assess the levels of glucose-associated symptoms triggered by a HFHS diet we conducted an  
84 oral glucose tolerance test (OGTT). No difference in fasting blood glucose levels between diet  
85 groups was observed (N = 30 (RD) / 29 (HFHS), median = 150 / 147 mg/dL). However, HFHS  
86 animals demonstrated impaired glucose intolerance upon application of an oral glucose dose;  
87 blood glucose levels 30 min, 60 min and 120 min after oral application were significantly increased  
88 compared to RD animals (**Fig 1 B**, N = 30 (RD) / 29 (HFHS), 30 minutes median = 265 / 313  
89 mg/dL and 60 minutes median = 290 / 347 mg/dL, ordinary two-way ANOVA, followed by Sidak's  
90 multiple comparisons test, p = 0.0004, p = 0.0009, respectively). We compared the insulin

91 response after application of oral glucose load and found no difference between the diet regimens.  
92 The insulin resistance index (fasting glucose level (mmol/L) x fasting insulin level (mIU/L) showed  
93 no significant differences (**Fig 1 C**, N = 30 (RD) / 29 (HFHS), Mann-Whitney test,  $p = 0.6871$ )  
94 (Hayashi et al., 2013; Li et al., 2009). Five animals were euthanized pre-challenge in order to  
95 assess diet induced pathology. There was no difference in body fat-to-weight ratio (**Fig 1 D**, N =  
96 5, median = 1.905 (RD) / 2.117 (HFHS) Fat:Bodyweight ratio (mg/g), Mann-Whitney test,  $p >$   
97 0.9999).

98

### 99 **High-fat and high-sugar diet induces liver damage and systemic hyperlipidemia**

100 We investigated the changes in lipid metabolism through a blood lipid biochemistry panel (**Sup**  
101 **Table 1**). Due to increased levels of fat in the samples collected from HFHS animals, HDL and  
102 LDL could not be assessed due to incompatibility with the instrument. Total cholesterol was  
103 significantly increased in the HFHS group (**Fig 1 E**, N = 10 (RD) / 7 (HFHS), median = 67.6 / 380  
104 mg/dL, Mann-Whitney test,  $p = 0.0001$ ). The median (146 U/L) alanine aminotransferase (ALT),  
105 an indication of hepatocellular injury without overt cholestasis, values in the HFHS animals were  
106 above the upper limit of previously established reference ranges (Washington and Van Hoosier,  
107 2012). To understand which lipids were circulating in serum, we analyzed serum by liquid  
108 chromatography tandem mass spectrometry (LC-MS/MS). Aggregate signals across all lipid  
109 classes assayed in the HFHS animals compared to RD were increased, comprising  
110 phospholipids, cholesterol esters, sphingolipids, neutral lipids, lysophospholipids, and free fatty  
111 acids (**Fig 1 F**, N = 5(RD) / 4 (HFHS), Mann-Whitney test,  $p = 0.0159$ ,  $p = 0.0635$ ,  $p = 0.0159$ ,  $p$   
112  $= 0.0317$ ,  $p = 0.0653$ ,  $p = 0.0317$ , respectively). Hence, we further assessed changes in the liver  
113 through gross and histologic pathology. Gross pathology of livers differed substantially. Livers  
114 from animals on the HFHS diet were diffusely pale, friable, and sections floated in formalin while  
115 RD hamster livers appeared grossly normal. Histologically, hepatocytes were expanded by micro

116 and macrovesicles in HFHS animals, while hepatocytes in RD animals appeared normal (**Fig 2 A**  
117 **- F**).

118 To further characterize the effect of the HFHS diet regimen on the liver, we evaluated global  
119 changes in the gene expression after 16 weeks. Principal components analysis of the complete  
120 gene expression profile revealed expected grouping with each diet regimen group containing their  
121 associated replicates (**Sup Fig 1 A**, N = 5 (RD), 4 HFHS). In total, 2,114 genes were significantly,  
122 differentially expressed ( $p < 0.05$  and  $> 2$ fold) in the liver. To assess the enrichment of these  
123 differential genes, they were imported into Ingenuity Pathway Analysis (IPA) software. The results  
124 show that in the comparison of HFHS to RD animals 124 canonical pathways were significantly  
125 enriched and 200 downstream effects were predicted on biological processes and disease or  
126 toxicological function ( $p$ -value  $< 0.05$ ,  $z$ -score  $\leq -2$  or  $\geq 2$ ): amongst which were cell recruitment,  
127 inflammation, activation, and immune-associated pathways (**Fig 2 G**, **Sup Table 2** shows all  
128 significant predicted downstream effects). Interestingly, we also observed a pathway activation  
129 pattern reminiscent of NAFLD TNF-driven inflammation, (**Fig 2 H**).

130 Together, these data suggest that HFHS diet induced drastic changes in glucose uptake and lipid  
131 metabolism, characterized by systemic dyslipidemia and gross changes in liver pathology. This  
132 translated into increased inflammation and a gene expression profile in the liver reminiscent of  
133 fatty liver disease.

134

### 135 **High-fat and high-sugar diet exacerbated disease severity after SARS-CoV-2 infection**

136 We challenged hamsters (RD: N = 20, HFHS = 13 (Group size adjusted for the HFHS group due  
137 to the morbidity of the model pre-challenge)) with  $8 \times 10^4$  TCID<sub>50</sub> SARS-CoV-2 via the intranasal  
138 route. Animals were euthanized at 7 days-post inoculation (DPI) (RD: N = 10, HFHS = 4), at 14  
139 DPI (RD: N = 5, HFHS = 4) or monitored until 21 DPI (RD: N = 5, HFHS = 5). We observed a  
140 trend of more severe morbidity in the HFHS group, in which two animals reached euthanasia  
141 criteria ( $> 20\%$  relative body weight loss) at 8 and 9 DPI, respectively (**Fig 3 A**). While the HFHS

142 animals demonstrated non-infection associated morbidity, the timing and symptoms associated  
143 with these fatalities suggest that they were caused by the infection. In the RD group, a median  
144 peak weight loss was observed at 6 DPI (~7% relative body weight), after which animals  
145 recovered and returned to pre-challenge weights by 14 DPI. Weight in HFHS animals was  
146 significantly decreased after 3 DPI and negative area under the curve (AUC) analysis between 1  
147 -14 DPI revealed significant difference (**Fig 3 B**, N = 10 (RD) / 7 (HFHS), Mann-Whitney test, p =  
148 0.0002). In the HFHS group median peak weight loss was reached at 8 DPI (~16% relative body  
149 weight) and no animal recovered pre-challenge weights until the end of the study at 21 DPI.

150 To better understand the clinical impact of a HFHS diet on SARS-CoV-2 infection, the respiratory  
151 function of the hamsters was evaluated. We performed forced oscillation tests on mechanically  
152 ventilated hamsters pre-challenge, and on 7, 14, and 21 DPI. No significant differences in  
153 pulmonary function were detected between the RD and HFHS groups at any time point.

154 Pulmonary function after SARS-CoV-2 infection has not been assessed in the Syrian hamster yet,  
155 so we combined the groups to evaluate changes over the course of infection. Inspiratory capacity  
156 was significantly decreased in 7 DPI as compared to pre-challenge (**Figure 3 C**, baseline: N = 5  
157 (RD) / 3 (HFHS) and 7 DPI: N = 5 (RD) / 4 (HFHS), baseline median = 4.345 / 4.032 and 7 DPI  
158 median = 3.195 / 3.464 mL, ordinary two-way ANOVA, followed by Tukey's multiple comparisons  
159 test, p = 0.0107). Elastance of the respiratory system was significantly increased at 7 DPI  
160 (baseline median = 2.68 / 3.032 and 7 DPI median = 4.138 / 3.852 cmH<sub>2</sub>O/mL, p = 0.0022), as  
161 was tissue elastance (baseline median = 2.514 / 2.450 and 7 DPI median = 3.021 / 3.217  
162 cmH<sub>2</sub>O/mL, p = 0.0040). The resistance of the airway not associated with gas exchange  
163 (Newtonian resistance) was not significantly different at any time point; however total resistance  
164 was significantly increased in 7 DPI as compared to pre-challenge (baseline median = 0.151 /  
165 0.167 and 7 DPI median = 0.181 / 0.205 cmH<sub>2</sub>O.s/mL, p = 0.034). Changes in peripheral  
166 resistance were also detected by an increase in tissue damping at 7 DPI as compared to pre-  
167 challenge animals, which reflects how oscillatory energy is dispersed or retained within

168 parenchymal tissue (baseline median = 0.564 / 0.623 and 7 DPI median = 0.695 / 0.720  
169 cmH<sub>2</sub>O/mL,  $p = 0.0158$ ). Recovery to pre-challenge was observed for all parameters by 14 DPI.  
170 Together, these changes in respiratory function led to an overall decrease in shape parameter  $k$ ,  
171 which reflects the curvature of the pressure-volume curve, on 7 DPI (**Fig 3 D**, baseline median =  
172 0.193 / 0.180 and 7 DPI median = 0.168 / 0.158 /cmH<sub>2</sub>O, ordinary two-way ANOVA, followed by  
173 Sidak's multiple comparisons test,  $p = 0.0001$ ). While not significant, a slower trend of recovery  
174 to pre-challenge values for resistance and tissue damping was observed in the HFHS group. This  
175 could indicate that functional lung recovery in this group was slower.

176

177 **High-fat and high-sugar diet is associated with exudate, vasculitis, inflammation of the**  
178 **epithelia and hemorrhage, fibrin and edema, and decreased viral clearance**

179 Next, we assessed the pathology in the lungs at necropsy, 7 DPI. Grossly, lungs displayed lesions  
180 with multifocal dark red foci visible on the surface of the lobes (**Fig 4 A-J**). Across groups the 7  
181 DPI lungs were more turgid, failed to collapse and had increased lung weights as compared to  
182 pre-challenge lungs (**Sup Fig 2 A**). Lung weight recovery appeared slower in HFHS animals.  
183 Histopathologically, only a subset of RD animals demonstrated increased lung damage ( $N = 5/10$ ,  
184  $> 50\%$  lung tissue affected). At 7 DPI, foci were multifocal and adjacent to bronchi and blood  
185 vessels as well as peripherally along the sub pleural margin. Overall, no significant difference  
186 was seen between the cumulative pathological score between diet groups. However, three out of  
187 four animals demonstrated lesions in  $>50\%$  of tissue (**Fig 4 K, Sup Fig 2 B**). In HFHS animals,  
188 foci were multifocal but less clearly delineated due to hemorrhage, edema, and fibrin. Interstitial  
189 pneumonia was characterized by thickened septa due to inflammatory cells, fibrin and edema and  
190 lined by hyperplastic type II pneumocytes. Alveoli were filled with inflammatory cells, edema and  
191 organizing fibrin. The two HFHS animals which were euthanized at day 8/9 due to severe disease  
192 and weight loss ( $>20\%$ ) both showed pneumonia, hemorrhage, edema, and inflammation (**Sup**  
193 **Fig 3**).



194 At 14 DPI, thickened septa, presumably from interstitial fibrosis with alveolar bronchiolization,  
195 were observed in lungs from RD animals (N = 2) (**Sup Fig 4 A-D**). In contrast, HFHS animals at  
196 14 DPI had less septal thickening and more septal, alveolar, and perivascular inflammation (N =  
197 2). At 21 DPI four out of five of the RD animals and three out of three of the HFHS animals had  
198 thickened alveolar septa with alveolar bronchiolization (**Sup Fig 4 E-H**).

199 Immunohistochemistry staining for SARS-CoV-2 antigen was increased at 7 DPI in lungs of HFHS  
200 animals compared to RD animals (median = 2.71 (RD) / 5.043 (HFHS), N = 10 / 4) (**Fig 4 E.J.L**).  
201 To confirm this finding, we compared genomic RNA, subgenomic (sg)RNA (surrogate for  
202 replicating virus) and infectious viral particles isolated from lungs at 7 DPI. Levels of gRNA and  
203 sgRNA in the lungs of HFHS animals at 7 DPI were significantly increased as compared to RD  
204 animals. Additionally, no infectious virus could be isolated from a subset of RD animals and  
205 overall, significantly more infectious virus could be isolated in HFHS animals (**Fig 4 M.N.O**; RD:  
206 N = 10, HFHS: N = 4, gRNA median = 6.935 / 8.513 copies/g lung ( $\log_{10}$ ), sgRNA median = 5.639  
207 / 7.896 copies/g lung ( $\log_{10}$ ) and infectious virus median = 1.63 / 3.703 TCID<sub>50</sub>/g ( $\log_{10}$ ), Mann-  
208 Whitney test, p = 0.0240, p = 0.0240 and p = 0.0120, respectively).

209 To better understand if the HFHS diet contributed to changes in viral replication kinetics in the  
210 upper respiratory tract, swabs from the oropharynx were analyzed for the presence of sgRNA.  
211 Respiratory shedding in both groups peaked at 2 DPI. Shedding in HFHS animals was constantly  
212 high up until 10 DPI, while shedding began decreasing in RD animals after 6 DPI. To compare  
213 the overall shedding burden, we performed an area under the curve (AUC) analysis for both  
214 groups depicting the cumulative shedding. HFHS animals presented significantly higher  
215 cumulative shedding (**Fig 4 P.Q**, N = 5 (RD) / 3 (HFHS), median 41.48 / 44.44 AUC ( $\log_{10}$ ), Mann-  
216 Whitney test, p = 0.0357).

217

218

219 **Immune infiltration in the lung during the acute-phase of infection and humoral immunity**  
220 **are not significantly affected by high-fat high-sugar diet**

221 Using immunohistochemistry, we investigated the infiltration of macrophages (IBA 1 staining), T-  
222 cells (CD3 staining), and B-cells (Pax 5 staining) over the course of infection (**Fig 5**). Macrophages  
223 were detected throughout all sections but were increased in 7 and 14 DPI samples in pneumonic  
224 areas irrespective of diet regimen. In addition, T lymphocytes were increased in 7 and 14 DPI  
225 samples in pneumonic areas. No increase in B cells was observed. To quantify the influx of  
226 macrophages and T cells we used morphometric analysis (**Sup Fig 5**). No significant difference  
227 was seen between the RD and HFHS groups. Both macrophages and T cells increased in  
228 numbers at 7 DPI as compared to pre-challenge conditions for both groups. (**Fig 6 A,B**, pre-  
229 challenge: N = (RD) / 2 (HFHS) and 7 DPI: N = 10 (RD) / 4 (HFHS), median macrophages =  
230 (3.075 / 3.530 (pre-challenge)) / (13.630 / 10.480 (7 DPI)) % reactivity and median T cells = (4.515  
231 / 4.125 (pre-challenge)) / (11.340 / 11.255 (7 DPI)) % reactivity, ordinary two-way ANOVA,  
232 followed by Sidak's multiple comparisons test,  $p = 0.1007 / 0.3564$  and  $p = 0.0001 / 0.0001$ ,  
233 respectively).

234 The humoral response to SARS-CoV-2 was not significantly impacted by diet regimen. Animals  
235 seroconverted at 7 DPI, as measured by anti-spike IgG ELISA (**Fig 6 C**, 7 DPI: N = 10 (RD) / 4  
236 (HFHS), 14 DPI: N = 5 (RD) / 4 (HFHS), 21 DPI: N = 5 (RD) / 3 (HFHS), ordinary two-way ANOVA,  
237 followed by Tukey's multiple comparisons test,  $p = 0.8573$ ,  $p = 0.8203$  and  $p = 0.5468$ ,  
238 respectively). Neutralization of virus by sera collected at 14 and 21 DPI was compared to assess  
239 potential differences in affinity maturation and no significant difference was found (**Fig 6 D**, 14  
240 DPI: N = 5 (RD) / 4 (HFHS), 21 DPI: N = 5 (RD) / 3 (HFHS), 14 DPI median = 120 / 80 and 21  
241 DPI median = 120/120 reciprocal titer, ordinary two-way ANOVA, followed by Tukey's multiple  
242 comparisons test,  $p = 0.5535$  and  $p = 0.4688$ , respectively).

243

244 **Prolonged SARS-CoV-2 shedding, systemic immune and metabolomic dysregulation after**  
245 **high-fat high-sugar diet**

246 The cytokine kinetics were analyzed in serum throughout the course of infection by ELISA. Serum  
247 samples were collected pre-challenge (0 DPI), on 7 DPI, 14 DPI and 21 DPI (**Fig 6 E**). Pro-  
248 inflammatory tumor necrosis factor (TNF)- $\alpha$ , interleukin (IL)-6, antiviral interferon (IFN)- $\gamma$ , and (IL)-  
249 10 did not significantly differ between diet regimens pre-challenge. After infection, RD animals  
250 mounted a significant IFN- $\gamma$  response which lasted into recovery (14 and 21 DPI), while no  
251 response was seen in HFHS animals (RD: N = 5/10, HFHS: N = 4, pre-challenge median = 629 /  
252 618, 7 DPI median = 737.85 / 550.6, 14 DPI median = 702.3 / 623.55, 21 DPI median = 1042.3 /  
253 609.8 pg/mL, ordinary two-way ANOVA, followed by Sidak's multiple comparisons test, pre-  
254 challenge: p = 0.58157, 7 DPI: p = 0.0090, 14 DPI: p = 0.7373, 21 DPI p < 0.0001). In contrast,  
255 serum IL-6 trended higher in HFHS animals compared to RD animals at 7 DPI (median = 2795.5  
256 (RD) / 2859.2 (HFHS) pg/mL). This trend toward higher IL-6 continued at 14 and 21 DPI. IL-10  
257 levels trended higher in HFHS animals during the acute phase and remained elevated at 14 DPI  
258 (RD: N = 5/10, HFHS: N = 4, pre-challenge median = 1894.6 / 2131.5, 7 DPI median = 2071.75 /  
259 2773.95, 14 DPI median = 1768.5 / 2354.35, 21 DPI median = 1733.7 / 2407.6 pg/mL ordinary  
260 two-way ANOVA, followed by Sidak's multiple comparisons test, pre-challenge: p = 0.9933, 7 DPI:  
261 p = 0.0548, 14 DPI: p = 0.1408, 21 DPI p = 1259). TNF- $\alpha$  serum levels demonstrated an  
262 ambivalent pattern.

263 To examine compositional changes in the circulating lipidome over the course of infection, the  
264 lipidome was analyzed between 0 DPI and 7 DPI of infection. This analysis revealed distinct lipid  
265 dynamics in response to SARS-CoV-2 infection (**Fig 6 F**). RD animals displayed a serum lipid  
266 shift in response to infection consisting primarily of decreased levels of phospholipids with mixed  
267 representation of lipid classes and a distribution of long chain and polyunsaturated fatty acids  
268 (PUFA). HFHS serum displayed a more drastic pattern of lipid depletion and enrichment.

269 Specifically, HFHS serum reflected a sharp enrichment of free polyunsaturated fatty acids (PUFA)  
270 and a combination of enrichment and depletion of PUFA containing phospholipids. This response  
271 peaked at 7 DPI and began to return to homeostasis by 14 DPI, though certain lipid patterns were  
272 carried out until 21 DPI.

273

## 274 **Discussion**

275 The development of animal models that faithfully recapitulate certain aspects of human disease  
276 remains a top priority in SARS-CoV-2 research. Healthy Syrian hamsters develop mild to  
277 moderate disease similar to the majority of human cases; however, they do not exhibit the more  
278 severe respiratory disease seen in humans with comorbidities such as obesity, diabetes, or other  
279 chronic illness (Araújo et al., 2019; Hussain et al., 2020; Korakas et al., 2020). Thus, we  
280 developed an experimental infection model of hamsters exclusively fed a high-fat high-sugar diet  
281 to model the impact of Western Diet on COVID-19 severity. In the Syrian hamster, this diet caused  
282 diet-induced morbidity, led to increased weight gain during adolescence, and ultimately led to in  
283 increased glucose tolerance, systemic hyperlipidemia, increased total cholesterol and a liver  
284 pathology reminiscent of a NAFLD-like phenotype. The lack of net weight gain in this model may  
285 present a means of decoupling liver associated pathologies such as NAFLD from obesity-  
286 associated disease more broadly. In humans NAFLD is predominantly a consequence of obesity  
287 and frequently associated also with other comorbidities as well (Sanyal, 2019). In the context of  
288 COVID-19, NAFLD is associated with increased hospitalization and disease severity (Bramante  
289 et al., 2020).

290 The morbidity observed in the absence of infection in the HFHS group should be considered in  
291 future studies utilizing this model. In particular, this feature of the model may make survival-based  
292 studies difficult. Human clinical studies of COVID-19 are plagued by this same difficulty in  
293 quantifying the contribution of infection and the associated comorbidities to the eventual cause of  
294 death. If appropriately controlled for in this model the relative contribution to death from the

295 infection and the comorbidities can be quantified. We observed that male hamsters on a HFHS  
296 diet demonstrated delayed lower and upper respiratory tract clearance after infection with SARS-  
297 CoV-2, which was accompanied by more severe disease presentation. Our data is in agreement  
298 with findings in mice, which have reported enhanced morbidity in aged and diabetic obese mice  
299 in a mouse-adapted SARS-CoV-2 model (Rathnasinghe et al., 2021). Conversely, we also  
300 observed increased weight loss, pathology, delayed lung recovery and influx of immune cells into  
301 the lung in a subset of hamsters fed a regular diet as compared to what has been shown in  
302 younger animals (Chan et al., 2020; Rosenke et al., 2020). This is likely due to the increased age  
303 of the animals used in this study (Osterrieder et al., 2020). Previously, lung function analysis after  
304 SARS-CoV-2 infection in a rodent model has only been demonstrated in ACE2 mice (Winkler et  
305 al., 2020). While not significantly different between the diet groups, we performed functional lung  
306 analysis for the first time in the Syrian hamster after SARS-CoV-2 infection and demonstrated  
307 that this model also recapitulates increased total airway resistance and decreased inspiratory  
308 capacity. This suggests that the Syrian hamster, besides recapitulating lung pathology, may also  
309 be a useful model for mechanistic studies of the respiratory parameters affected by COVID-19.  
310 Importantly, the HFHS Syrian hamster model presented here recapitulated two key mediators of  
311 severe human COVID-19. One unique feature of the cytokine profile in human disease is the  
312 elevation of IL-6 and IL-10, which have been indicated as causes of increased pathology (Chen  
313 et al., 2020; Dhar et al., 2020; Lu et al., 2021; Wang et al., 2020). In line with this, in HFHS animals  
314 we observed trending increases in serum IL-10 and IL-6 levels after infection. Secondly, in  
315 response to infection, HFHS animals showed a more severe response in their serum lipids at 7  
316 DPI compared to RD animals. The lipids that dominated this response were free-PUFAs and  
317 PUFA-containing phosphatidylethanolamine (PE). In addition, we saw mixed increase and  
318 decrease of PUFA-containing plasmalogens and triacylglycerols. The metabolic comorbidities  
319 associated with severe COVID-19 were previously shown to correlate with specific mobilization  
320 of serum lipids in a human cohort (Schwarz et al., 2020). Specifically, disease severity, defined

321 by ICU admittance, was shown to be associated with increased free PUFAs and PUFA-containing  
322 phosphatidylethanolamine, as well as a decrease of PUFA-containing phosphatidylcholine and  
323 plasmalogen, compared to non-ICU hospitalized patients. These imbalances were reflected in the  
324 circulating milieu of immune-active, PUFA-derived lipid mediators in these patients. The lipid  
325 pattern findings in the Syrian hamster model suggest that these serum lipid changes are  
326 dependent on preexisting serum hyperlipidemia and stimulated by infection with SARS-CoV-2.  
327 Despite the lack of obesity in these animals, the matching of clinical SARS-CoV-2-associated lipid  
328 patterns and cytokine profile in this model supports its utility in examining lipid and inflammation  
329 dynamics associated immune dysregulation during infection.

330 Of note, this did not seem to adversely affect the humoral immune response while viral titers in  
331 oropharyngeal swabs and lung tissues suggested delayed clearance in the HFHS group. This  
332 may indicate that other immune pathways were disproportionately affected, but further  
333 investigations would be necessary to draw concrete conclusions.

334 Taking the limitations of the model into account, our data further suggests the possible suitability  
335 of the Syrian hamster model to assess immunomodulatory therapies. While dietary advice for  
336 those suffering from metabolic diseases is proposed to reduce burden of severe COVID-19  
337 (Demasi, 2021), it remains doubtful if any change in diet can impact disease outcome favorably  
338 after infection has occurred. Targeted immunomodulatory therapies, such as anti-IL-6 therapies,  
339 may be more efficient (Zhong et al., 2020). The Syrian hamster model may also be applied to  
340 further studies of selected aspects of NAFLD, which the model recapitulates. This model seems  
341 to present with an absence or limited amount of liver fibrosis; further work is needed to  
342 demonstrate how faithfully it assesses the direct effect of liver fibrosis on acute disease. However,  
343 it may be useful to assess long term post-COVID-19 NAFLD, to document further deterioration of  
344 liver damage (Portincasa et al., 2020) and the relation to infection sequelae.

345

346 **Acknowledgements**

347 The authors would like to thank Kwe Claude Yinda and Robert Fisher for technical support, the  
348 Rocky Mountain Veterinary branch, including Marissa Woods, Nicki Arndt, Amanda Weidow,  
349 Linda Couey and Brian Mosbrucker for assistance with high containment husbandry, Tina  
350 Thomas, and Rebecca Rosenke for assistance with histology and Danielle Hopkins for flexiVent  
351 support and Kathryn Willebrand and Taylor Saturday for assistance with manuscript editing. This  
352 research was supported by the Intramural Research Program of the National Institute of Allergy  
353 and Infectious Diseases (NIAID), National Institutes of Health (NIH).

354

### 355 **Author Contributions**

356 Conceptualization, J.R.P.;  
357 Methodology, J.R.P., D.R.A., and B.S.;  
358 Investigation, J.R.P., D.R.A., B.S., J.E.S., V.A.A., M.G.H., J.N.P., D.S, K.A.S., I.L., B.J.S., C.S.;  
359 Writing – Original Draft, J.R.P., D.R.A., B.S., C.S.;  
360 Writing – Review & Editing, J.R.P., D.R.A. and V.J.M.;  
361 Funding Acquisition, VJ..M.;  
362 Resources, V.A.A., B.S., B.J.S. and C.M.B.;  
363 Supervision, V.J.M.

364

365

### 366 **Declaration of Interest**

367 The authors declare no competing financial interests.

368

### 369 **Methods**

#### 370 *Ethics statement*

371 Approval of animal experiments was obtained from the Institutional Animal Care and Use  
372 Committee of the Rocky Mountain Laboratories. Performance of experiments was done following  
373 the guidelines and basic principles in the United States Public Health Service Policy on Humane  
374 Care and Use of Laboratory Animals and the Guide for the Care and Use of Laboratory Animals.  
375 Work with infectious SARS-CoV-2 strains under BSL3 conditions was approved by the  
376 Institutional Biosafety Committee (IBC). Inactivation and removal of samples from high

377 containment was performed per IBC-approved standard operating procedures (Haddock et al.,  
378 2021).

379

#### 380 *Virus and cells*

381 SARS-CoV-2 strain nCoV-WA1-2020 (MN985325.1) was provided by CDC, Atlanta, USA. Virus  
382 propagation was performed in VeroE6 cells in DMEM supplemented with 2% foetal bovine serum  
383 (FBS), 2 mM L-glutamine, 100 U/mL penicillin and 100 µg/mL streptomycin. VeroE6 cells were  
384 maintained in DMEM supplemented with 10% FBS, 2 mM L-glutamine, 100 U/mL penicillin and  
385 100 µg/mL streptomycin D10. Virus stock was 100% identical to the initial sequence  
386 (MN985325.1) and no contaminants were detected.

387

#### 388 *High-fat high-sugar diet*

389 Four to six-week-old male Syrian Golden hamsters (ENVIGO) were randomly assigned to either  
390 regular rodent chow (Teklad Global 16% Protein Rodent Diet, Envigo) or a HFHS diet for 16  
391 weeks (Purina Chow #5001 with 11.5% Corn Oil, 11.5% Coconut Oil, 0.5% Cholesterol, 0.25%  
392 Deoxycholic Acid, and 10% Fructose: Dyets Inc., Dyet#615088). Pre-challenge oral glucose tests  
393 were performed on all animals. Five animals from each diet group were euthanized after the 16  
394 wks for collection of pre-challenge tissue samples and weights. For each diet group, 5 animals  
395 were randomly designated for flexiVent calibration and excluded from further analysis. Three  
396 animals in the HFHS regimen were euthanized throughout the 16-week diet regimen due to  
397 secondary morbidities and were not included in analyses. Pre-challenge, an additional 5 animals  
398 in the RD group and additional 8 animals in the HFHS group were excluded from the study due  
399 to experimental reasons, and one animal in the HFHS group due to secondary morbidities.

400

#### 401 *Assessment of glucose tolerance*



402 An oral glucose tolerance test (OGTT) was performed after 16 weeks of diet manipulation  
403 (Dalbøge et al., 2015). Hamsters were fasted for 16 h overnight preceding the OGTT. An oral  
404 glucose load (2 g/kg glucose) was administered. Blood samples were collected from the  
405 retroorbital sinus using capillary tube at 0-, 30-, 60-, and 120-min post glucose administration.  
406 Blood glucose was measured using the AlphaTRAK blood glucose monitoring system (Zoetis),  
407 calibrated for cats. Serum was separated and used for measurement of insulin. Insulin was  
408 measured using the rat/mouse insulin ELISA kit from Millipore (EZRMI-13K), according to the  
409 manufacturer's instructions (Wang et al., 2001).

410

#### 411 *Lipidomics*

412 Blood lipids were assessed for a subset of animals (N= 8-10) after 16 weeks of diet. 200 µL blood  
413 was collected and were measured using the Piccolo® Lipid Panel Plus for humans (Abraxis)  
414 according to the manufacturer's instruction.

415

#### 416 *Next-generation sequencing of liver mRNA*

417 Frozen tissues were pulverized in 1 mL of Trizol (ThermoFisher Scientific), 200 µL of 1-Bromo-3-  
418 chloropropane (MilliporeSigma) was added, samples mixed, and centrifuged at 16,000 x g for 15  
419 min at 4 °C. RNA containing aqueous phase of 600 µL was collected from each sample and  
420 passed through Qias shredder column (Qiagen) at 21,000 x g for 2 min to homogenize any  
421 remaining genomic DNA in the aqueous phase. Aqueous phase was combined with 600 µL of  
422 RLT lysis buffer (Qiagen, Valencia, CA) with 1% beta mercaptoethanol (MilliporeSigma) and RNA  
423 was extracted using Qiagen AllPrep DNA/RNA 96-well system. An additional on-column DNase-  
424 1 treatment was performed during RNA extraction. RNA was quantitated by spectrophotometry  
425 and yield ranged from 0.4 to 17.8 µg. One hundred nanograms of RNA was used as input for  
426 rRNA depletion and NGS library preparation following the Illumina Stranded Total RNA Prep  
427 Ligation with Ribo-Zero Plus workflow (Illumina). The NGS libraries were prepared, amplified for

428 13 cycles, AMPureXP bead (Beckman Coulter) purified using 0.95X beads, assessed on a  
429 BioAnalyzer DNA1000 chip (Agilent Technologies) and quantified using the Kapa Quantification  
430 Kit for Illumina Sequencing (Roche). Amplified libraries were pooled at equal molar amounts and  
431 sequenced on a NextSeq (Illumina) using two High Output 150 cycle chemistry kits. Raw fastq  
432 reads were trimmed of Illumina adapter sequences using cutadapt version 1.12 and then trimmed  
433 and filtered for quality using the FASTX-Toolkit (Hannon Lab). Remaining reads were aligned to  
434 the *Mesocricetus auratus* genome assembly version 1.0 using Hisat2 (Kim et al., 2015). Reads  
435 mapping to genes were counted using htseq-count (Anders et al., 2015). Differential expression  
436 analysis was performed using the Bioconductor package DESeq2 (Love et al., 2014). Pathway  
437 analysis was performed using Ingenuity Pathway Analysis (QIAGEN) and gene clustering was  
438 performed using Partek Genomics Suite (Partek Inc.). Samples with too low quality were removed  
439 from the analysis (Sup Table 1).

440

#### 441 *Next-generation sequencing of virus*

442 For sequencing from viral stocks, sequencing libraries were prepared using Stranded Total RNA  
443 Prep Ligation with Ribo-Zero Plus kit per manufacturer's protocol (Illumina) and sequenced on an  
444 Illumina MiSeq at 2 x 150 base pair reads. For sequencing from swab and lung tissue, total RNA  
445 was depleted of ribosomal RNA using the Ribo-Zero Gold rRNA Removal kit (Illumina).  
446 Sequencing libraries were constructed using the KAPA RNA HyperPrep kit following  
447 manufacturer's protocol (Roche Sequencing Solutions). To enrich for SARS-CoV-2 sequence,  
448 libraries were hybridized to myBaits Expert Virus biotinylated oligonucleotide baits following the  
449 manufacturer's manual, version 4.01 (Arbor Biosciences). Enriched libraries were sequenced on  
450 the Illumina MiSeq instrument as paired-end 2 X 150 base pair reads. Raw fastq reads were  
451 trimmed of Illumina adapter sequences using cutadapt version 1.1227 and then trimmed and  
452 filtered for quality using the FASTX-Toolkit (Hannon Lab, CSHL). Remaining reads were mapped  
453 to the SARS-CoV-2 2019-nCoV/USA-WA1/2020 genome (MN985325.1) using Bowtie2 version

454 2.2.928 with parameters --local --no-mixed -X 1500. PCR duplicates were removed using picard  
455 MarkDuplicates (Broad Institute) and variants were called using GATK HaplotypeCaller version  
456 4.1.2.029 with parameter -ploidy 2. Variants were filtered for QUAL > 500 and DP > 20 using  
457 bcftools.

458

#### 459 *Inoculation experiments*

460 After 16 weeks, animals were then inoculated intranasally (I.N.) under isoflurane anaesthesia. I.N.  
461 inoculation was performed with 40  $\mu$ L sterile Dulbecco's Modified Eagle Medium (DMEM)  
462 containing  $8 \times 10^4$  TCID<sub>50</sub> SARS-CoV-2. A subset of animals (N= 4-10) were euthanized, and  
463 serum and tissues were collected at pre-challenge (0 DPI), 4, 7, 14, and 21 DPI. Hamsters were  
464 weighted daily, and oropharyngeal swabs (21 DPI animals only) were taken daily until day 7 and  
465 then thrice a week. Swabs were collected in 1 mL DMEM with 200 U/mL penicillin and 200  $\mu$ g/mL  
466 streptomycin. Hamsters were observed daily for clinical signs of disease.

467

#### 468 *Lung function analyses*

469 Lung function assessment was performed on pre-challenge, 7, 14, and 21 DPI. Hamsters were  
470 anesthetized with a combination of inhalant isoflurane and ketamine/xylazine intraperitoneally.  
471 After animals reached a surgical plane of anaesthesia a terminal tracheostomy was performed as  
472 previously described (McGovern TK JOVE 2013). Briefly, a cannula was introduced into the  
473 trachea, secured with suture, and the animal underwent the forced oscillation technique (FOT)  
474 using a flexiVent (SCIREZ, Inc.). Animals were kept at a consistent surgical plane of anesthesia  
475 to the point of not resisting the FOT procedure. Animals were immediately euthanized while  
476 deeply anesthetized after FOT was completed; the surgical procedure was terminal.

477

#### 478 *Histopathology and immunohistochemistry*

479 Necropsies and tissue sampling were performed according to IBC-approved protocols. Tissues  
480 were fixed for a minimum of 7 days in 10% neutral buffered formalin with 2 changes. Tissues were  
481 placed in cassettes and processed with a Sakura VIP-6 Tissue Tek, on a 12-hour automated  
482 schedule, using a graded series of ethanol, xylene, and ParaPlast Extra. Prior to staining,  
483 embedded tissues were sectioned at 5  $\mu\text{m}$  and dried overnight at 42°C. Using GenScript  
484 U864YFA140-4/CB2093 NP-1 (1:1000) specific anti-CoV immunoreactivity, CD3 (Predilute)  
485 (Roche Tissue Diagnostics #790-4341), and PAX5 (1:500) (Novus Biologicals #NBP2-38790)  
486 were detected using the Vector Laboratories ImPress VR anti-rabbit IgG polymer (# MP-6401) as  
487 the secondary antibody. Iba-1 (1:500) (abcam #ab5076) was detected using Roche Tissue  
488 Diagnostics OmniMap anti-goat multimer (#760-4647) as the secondary antibody. The tissues  
489 were stained using the Discovery Ultra automated stainer (Ventana Medical Systems) with a  
490 ChromoMap DAB kit Roche Tissue Diagnostics (#760-159).

491

#### 492 *Morphometric analysis.*

493 IHC stained tissue slides were scanned with an Aperio ScanScope XT (Aperio Technologies, Inc.)  
494 and analyzed using the ImageScope Positive Pixel Count algorithm (version 9.1). The default  
495 parameters of the Positive Pixel Count (hue of 0.1 and width of 0.5) detected antigen adequately.

496

#### 497 *Viral RNA detection*

498 Swabs from hamsters were collected as described above. Cage and bedding material was  
499 sampled with prewetted swabs in 1 mL of DMEM supplemented with 200 U/mL penicillin and 200  
500  $\mu\text{g}/\text{mL}$  streptomycin. Then, 140  $\mu\text{L}$  was utilized for RNA extraction using the QIAamp Viral RNA  
501 Kit (Qiagen) using QIAcube HT automated system (Qiagen) according to the manufacturer's  
502 instructions with an elution volume of 150  $\mu\text{L}$ . Sub-genomic (sg) viral RNA and genomic (g) was  
503 detected by qRT-PCR (Corman et al., 2020a; Corman et al., 2020b). Five  $\mu\text{L}$  RNA was tested  
504 with TaqMan™ Fast Virus One-Step Master Mix (Applied Biosystems) using QuantStudio 6 Flex

505 Real-Time PCR System (Applied Biosystems) according to instructions of the manufacturer. Ten-  
506 fold dilutions of SARS-CoV-2 standards with known copy numbers were used to construct a  
507 standard curve and calculate copy numbers/mL.

508

#### 509 *Viral titration*

510 Viable virus in tissue samples was determined as previously described (van Doremalen et al.,  
511 2017). In brief, lung tissue samples were weighted, then homogenized in 1 mL of DMEM2. VeroE6  
512 cells were inoculated with ten-fold serial dilutions of tissue homogenate, spun at 1000 rpm for 1 h  
513 at 37 °C, the first dilutions washed with PBS and with DMEM2. Cells were incubated with tissue  
514 homogenate for 6 days at 37 °C, 5% CO<sub>2</sub>, then scored for cytopathic effect. TCID<sub>50</sub> was calculated  
515 by the method of Spearman-Kärber and adjusted for tissue weight.

516

#### 517 *Serology*

518 Serum samples were inactivated with  $\gamma$ -irradiation (2 mRad) and analyzed as previously  
519 described (Yinda et al., 2020). In brief, maxisorp plates (Nunc) were coated with 50 ng spike  
520 protein (generated in-house) per well and incubated overnight at 4 °C. After blocking with casein  
521 in phosphate buffered saline (PBS) (ThermoFisher) for 1 h at room temperature (RT), serially  
522 diluted 2-fold serum samples (duplicate, in blocking buffer) were incubated for 1 h at RT. Spike-  
523 specific antibodies were detected with goat anti-hamster IgG Fc (horseradish peroxidase (HRP)-  
524 conjugated, Abcam) for 1 h at RT and visualized with KPL TMB 2-component peroxidase  
525 substrate kit (SeraCare, 5120-0047). The reaction was stopped with KPL stop solution (Seracare)  
526 and read at 450 nm. Plates were washed 3 to 5 x with PBS-T (0.1 % Tween) for each wash. The  
527 threshold for positivity was calculated as the average plus 3 x the standard deviation of negative  
528 control hamster sera.

529

#### 530 *Cytokine analysis*

531 Cytokine concentrations were determined using a commercial hamster ELISA kit for TNF- $\alpha$ , INF-  
532  $\gamma$ , IL-6, IL-4, and IL-10 available at antibodies.com, according to the manufacturer's instructions  
533 (antibodies.com; A74292, A74590, A74291, A74027, A75096). Samples were pre-diluted 1:10.

534

535 Serum lipid analysis

536 For abundance analysis of serum lipids signals were filtered using a 50 % miss value cut off and  
537 applying a raw intensity cutoff appropriate to the noise level of each class of lipids. Signals were  
538 then normalized to internal deuterated SPLASH® LIPIDOMIX® Mass Spec Standard (Avanti  
539 Polar Lipids). For compositional analysis of the serum, bulk lipid datasets were further filtered  
540 using a 30 % QC coefficient of variance cut off prior to normalizing by the total signal sum. All  
541 univariate and multivariate analysis was performed using GraphPad Prism or MarkerView (AB  
542 Sciex). All parallel univariate analysis was subjected to a Benjamini-Hochberg correction using a  
543 false discovery rate of 15 %.

544

545 *Statistical analysis*

546 All graphs were designed in GraphPad Prism software (version 8.0.1; GraphPad Software).  
547 Significance test were performed as indicated where appropriate. Statistical significance levels  
548 were determined as follows: ns =  $p > 0.05$ ; \* =  $p \leq 0.05$ ; \*\* =  $p \leq 0.01$ ; \*\*\* =  $p \leq 0.001$ ; \*\*\*\* =  $p \leq$   
549 0.0001.

550

551

552

553 **References**

554

555 Anders, S., Pyl, P.T., and Huber, W. (2015). HTSeq--a Python framework to work with high-throughput  
556 sequencing data. *Bioinformatics* 31, 166-169.

557 Araújo, J., Cai, J., and Stevens, J. (2019). Prevalence of Optimal Metabolic Health in American Adults:  
558 National Health and Nutrition Examination Survey 2009-2016. *Metab Syndr Relat Disord* 17, 46-52.

559 Bramante, C., Tignanelli, C.J., Dutta, N., Jones, E., Tamariz, L., Clark, J.M., Usher, M., Metlon-Meaux,  
560 G., and Ikramuddin, S. (2020). Non-alcoholic fatty liver disease (NAFLD) and risk of hospitalization for  
561 Covid-19. medRxiv.

562 Butler, M.J., and Barrientos, R.M. (2020). The impact of nutrition on COVID-19 susceptibility and long-  
563 term consequences. *Brain Behav Immun* 87, 53-54.

564 Cefalu, W.T., and Rodgers, G.P. (2021). COVID-19 and metabolic diseases: a heightened awareness of  
565 health inequities and a renewed focus for research priorities. *Cell Metabolism* 33, 473-478.

566 Chan, J.F.-W., Zhang, A.J., Yuan, S., Poon, V.K.-M., Chan, C.C.-S., Lee, A.C.-Y., Chan, W.-M., Fan, Z.,  
567 Tsoi, H.-W., Wen, L., *et al.* (2020). Simulation of the Clinical and Pathological Manifestations of  
568 Coronavirus Disease 2019 (COVID-19) in a Golden Syrian Hamster Model: Implications for Disease  
569 Pathogenesis and Transmissibility. *Clinical Infectious Diseases*.

570 Chen, G., Wu, D., Guo, W., Cao, Y., Huang, D., Wang, H., Wang, T., Zhang, X., Chen, H., Yu, H., *et al.*  
571 (2020). Clinical and immunological features of severe and moderate coronavirus disease 2019. *J Clin*  
572 *Invest* 130, 2620-2629.

573 Cordain, L., Eaton, S.B., Sebastian, A., Mann, N., Lindeberg, S., Watkins, B.A., O'Keefe, J.H., and  
574 Brand-Miller, J. (2005). Origins and evolution of the Western diet: health implications for the 21st  
575 century. *Am J Clin Nutr* 81, 341-354.

576 Corman, V.M., Landt, O., Kaiser, M., Molenkamp, R., Meijer, A., Chu, D.K., Bleicker, T., Brünink, S.,  
577 Schneider, J., Schmidt, M.L., *et al.* (2020a). Detection of 2019 novel coronavirus (2019-nCoV) by real-  
578 time RT-PCR. *Euro surveillance : bulletin Europeen sur les maladies transmissibles = European*  
579 *communicable disease bulletin* 25, 2000045.

580 Corman, V.M., Landt, O., Kaiser, M., Molenkamp, R., Meijer, A., Chu, D.K., Bleicker, T., Brunink, S.,  
581 Schneider, J., Schmidt, M.L., *et al.* (2020b). Detection of 2019 novel coronavirus (2019-nCoV) by real-  
582 time RT-PCR. *Euro Surveill* 25.

583 Dalbøge, L.S., Pedersen, P.J., Hansen, G., Fabricius, K., Hansen, H.B., Jelsing, J., and Vrang, N. (2015).  
584 A Hamster Model of Diet-Induced Obesity for Preclinical Evaluation of Anti-Obesity, Anti-Diabetic and  
585 Lipid Modulating Agents. *PloS one* 10, e0135634-e0135634.

586 Demasi, M. (2021). COVID-19 and metabolic syndrome: could diet be the key? *BMJ Evidence-Based*  
587 *Medicine* 26, 1-2.

588 Dhar, S.K., K, V., Damodar, S., Gujar, S., and Das, M. (2020). IL-6 and IL-10 as predictors of disease  
589 severity in COVID 19 patients: Results from Meta-analysis and Regression. medRxiv,  
590 2020.2008.2015.20175844.

591 Green, W.D., and Beck, M.A. (2017a). Obesity altered T cell metabolism and the response to infection.  
592 *Curr Opin Immunol* 46, 1-7.

593 Green, W.D., and Beck, M.A. (2017b). Obesity Impairs the Adaptive Immune Response to Influenza  
594 Virus. *Ann Am Thorac Soc* 14, S406-s409.

595 Haddock, E., Feldmann, F., Shupert, W.L., and Feldmann, H. (2021). Inactivation of SARS-CoV-2  
596 Laboratory Specimens. *Am J Trop Med Hyg* 104, 2195-2198.

597 Hayashi, T., Boyko, E.J., Sato, K.K., McNeely, M.J., Leonetti, D.L., Kahn, S.E., and Fujimoto, W.Y.  
598 (2013). Patterns of insulin concentration during the OGTT predict the risk of type 2 diabetes in Japanese  
599 Americans. *Diabetes Care* 36, 1229-1235.

600 Hussain, A., Mahawar, K., Xia, Z., Yang, W., and El-Hasani, S. (2020). Obesity and mortality of  
601 COVID-19. Meta-analysis. *Obes Res Clin Pract* 14, 295-300.

602 Kasim-Karakas, S.E., Vriend, H., Almario, R., Chow, L.C., and Goodman, M.N. (1996). Effects of  
603 dietary carbohydrates on glucose and lipid metabolism in golden Syrian hamsters. *J Lab Clin Med* 128,  
604 208-213.

605 Kim, D., Langmead, B., and Salzberg, S.L. (2015). HISAT: a fast spliced aligner with low memory  
606 requirements. *Nature Methods* 12, 357-360.

607 Korakas, E., Ikonomidis, I., Kousathana, F., Balampanis, K., Kountouri, A., Raptis, A., Palaiodimou, L.,  
608 Kokkinos, A., and Lambadiari, V. (2020). Obesity and COVID-19: immune and metabolic derangement  
609 as a possible link to adverse clinical outcomes. *Am J Physiol Endocrinol Metab* 319, E105-e109.  
610 Li, G., Liu, X., Zhu, H., Huang, L., Liu, Y., Ma, C., and Qin, C. (2009). Insulin resistance in insulin-  
611 resistant and diabetic hamsters (*Mesocricetus auratus*) is associated with abnormal hepatic expression of  
612 genes involved in lipid and glucose metabolism. *Comp Med* 59, 449-458.  
613 Love, M.I., Huber, W., and Anders, S. (2014). Moderated estimation of fold change and dispersion for  
614 RNA-seq data with DESeq2. *Genome Biology* 15, 550.  
615 Lu, L., Zhang, H., Dauphars, D.J., and He, Y.-W. (2021). A Potential Role of Interleukin 10 in COVID-  
616 19 Pathogenesis. *Trends in Immunology* 42, 3-5.  
617 Nie, S., Han, S., Ouyang, H., and Zhang, Z. (2020). Coronavirus Disease 2019-related dyspnea cases  
618 difficult to interpret using chest computed tomography. *Respir Med* 167, 105951-105951.  
619 Osterrieder, N., Bertzbach, L.D., Dietert, K., Abdelgawad, A., Vladimirova, D., Kunec, D., Hoffmann,  
620 D., Beer, M., Gruber, A.D., and Trimpert, J. (2020). Age-Dependent Progression of SARS-CoV-2  
621 Infection in Syrian Hamsters. *Viruses* 12.  
622 Parry, A.H., Wani, A.H., Yaseen, M., Dar, K.A., Choh, N.A., Khan, N.A., Shah, N.N., and Jehangir, M.  
623 (2020). Spectrum of chest computed tomographic (CT) findings in coronavirus disease-19 (COVID-19)  
624 patients in India. *Eur J Radiol* 129, 109147-109147.  
625 Petrakis, D., Margină, D., Tsarouhas, K., Tekos, F., Stan, M., Nikitovic, D., Kouretas, D., Spandidos,  
626 D.A., and Tsatsakis, A. (2020). Obesity - a risk factor for increased COVID-19 prevalence, severity and  
627 lethality (Review). *Mol Med Rep* 22, 9-19.  
628 Portincasa, P., Krawczyk, M., Smyk, W., Lammert, F., and Di Ciaula, A. (2020). COVID-19 and non-  
629 alcoholic fatty liver disease: Two intersecting pandemics. *Eur J Clin Invest* 50, e13338.  
630 Rathnasinghe, R., Jangra, S., Cupic, A., Martinez-Romero, C., Mulder, L.C.F., Kehrer, T., Yildiz, S.,  
631 Choi, A., Mena, I., De Vrieze, J., *et al.* (2021). The N501Y mutation in SARS-CoV-2 spike leads to  
632 morbidity in obese and aged mice and is neutralized by convalescent and post-vaccination human sera.  
633 medRxiv, 2021.2001.2019.21249592.  
634 Rogero, M.M., and Calder, P.C. (2018). Obesity, Inflammation, Toll-Like Receptor 4 and Fatty Acids.  
635 *Nutrients* 10.  
636 Rosenke, K., Meade-White, K., Letko, M., Clancy, C., Hansen, F., Liu, Y., Okumura, A., Tang-Huau,  
637 T.L., Li, R., Saturday, G., *et al.* (2020). Defining the Syrian hamster as a highly susceptible preclinical  
638 model for SARS-CoV-2 infection. *Emerg Microbes Infect*, 1-36.  
639 Saklayen, M.G. (2018). The Global Epidemic of the Metabolic Syndrome. *Curr Hypertens Rep* 20, 12.  
640 Sanyal, A.J. (2019). Past, present and future perspectives in nonalcoholic fatty liver disease. *Nature*  
641 *Reviews Gastroenterology & Hepatology* 16, 377-386.  
642 Schwarz, B., Sharma, L., Roberts, L., Peng, X., Bermejo, S., Leighton, I., Casanovas-Massana, A.,  
643 Minasyan, M., Farhadian, S., Ko, A.I., *et al.* (2020). Cutting Edge: Severe SARS-CoV-2 Infection in  
644 Humans Is Defined by a Shift in the Serum Lipidome, Resulting in Dysregulation of Eicosanoid Immune  
645 Mediators. *The Journal of Immunology*, ji2001025.  
646 Sia, S.F., Yan, L.M., Chin, A.W.H., Fung, K., Choy, K.T., Wong, A.Y.L., Kaewpreedee, P., Perera, R.,  
647 Poon, L.L.M., Nicholls, J.M., *et al.* (2020). Pathogenesis and transmission of SARS-CoV-2 in golden  
648 hamsters. *Nature*.  
649 Swinburn, B.A., Sacks, G., Hall, K.D., McPherson, K., Finegood, D.T., Moodie, M.L., and Gortmaker,  
650 S.L. (2011). The global obesity pandemic: shaped by global drivers and local environments. *The Lancet*  
651 378, 804-814.  
652 van Doremalen, N., Falzarano, D., Ying, T., de Wit, E., Bushmaker, T., Feldmann, F., Okumura, A.,  
653 Wang, Y., Scott, D.P., Hanley, P.W., *et al.* (2017). Efficacy of antibody-based therapies against Middle  
654 East respiratory syndrome coronavirus (MERS-CoV) in common marmosets. *Antiviral Res* 143, 30-37.  
655 Wang, J., Jiang, M., Chen, X., and Montaner, L.J. (2020). Cytokine storm and leukocyte changes in mild  
656 versus severe SARS-CoV-2 infection: Review of 3939 COVID-19 patients in China and emerging  
657 pathogenesis and therapy concepts. *J Leukoc Biol*.



658 Wang, P.-R., Guo, Q., Ippolito, M., Wu, M., Milot, D., Ventre, J., Doebber, T., Wright, S.D., and Chao,  
659 Y.-S. (2001). High fat fed hamster, a unique animal model for treatment of diabetic dyslipidemia with  
660 peroxisome proliferator activated receptor alpha selective agonists. *European Journal of Pharmacology*  
661 *427*, 285-293.  
662 Washington, I.M., and Van Hoosier, G. (2012). *Clinical Biochemistry and Hematology. The Laboratory*  
663 *Rabbit, Guinea Pig, Hamster, and Other Rodents*, 57-116.  
664 Winkler, E.S., Bailey, A.L., Kafai, N.M., Nair, S., McCune, B.T., Yu, J., Fox, J.M., Chen, R.E., Earnest,  
665 J.T., Keeler, S.P., *et al.* (2020). SARS-CoV-2 infection of human ACE2-transgenic mice causes severe  
666 lung inflammation and impaired function. *Nature Immunology* *21*, 1327-1335.  
667 Yinda, C.K., Port, J.R., Bushmaker, T., Owusu, I.O., Avanzato, V.A., Fischer, R.J., Schulz, J.E.,  
668 Holbrook, M.G., Hebner, M.J., Rosenke, R., *et al.* (2020). K18-hACE2 mice develop respiratory disease  
669 resembling severe COVID-19. *bioRxiv*.  
670 Zhong, J., Tang, J., Ye, C., and Dong, L. (2020). The immunology of COVID-19: is immune modulation  
671 an option for treatment? *The Lancet Rheumatology* *2*, e428-e436.  
672

673

674

## 675 **Figure titles and legend**

676

677 **Figure 1: High-fat and high-sugar diet induces metabolic changes characterized by**  
678 **increased juvenile weight gain and glucose tolerance.** Male Syrian hamsters were fed either  
679 a regular or high-fat high-sugar diet *ad libitum* for 16 weeks. **A.** Relative weight gain in hamsters  
680 on each diet regimen, measured weekly. Graphs show median  $\pm$  95% CI, N = 35, ordinary two-  
681 way ANOVA, followed by Sidak's multiple comparisons test. **B.** Oral glucose tolerance test  
682 performed at 16 weeks. Graphs show median  $\pm$  95% CI, N = 30 (RD) / 29 (HFHS), ordinary two-  
683 way ANOVA, followed by Sidak's multiple comparisons test. **C.** Insulin response after application  
684 of oral glucose load as shown by insulin resistance index (fasting glucose level (mmol/L) x fasting  
685 insulin level (mIU/L)). Truncated violin plots depicting median, quartiles and individuals, N = 30  
686 (RD) / 29 (HFHS), Mann-Whitney test. **D.** Adiposity index as measured by testicular fat pads/total  
687 body weight at 16 weeks. Truncated violin plots depicting median, quartiles and individuals, N =  
688 5, Mann-Whitney test. **E.** Blood lipid ALT and cholesterol levels measured on a commercially  
689 available lipid panel on an automated blood chemistry analyzer. **F.** Serum aggregate lipids signal  
690 analyzed by liquid chromatography tandem mass spectrometry (LC-MS/MS) at 16 weeks of diet

691 regimen. Truncated violin plots depicting median, quartiles and individuals,  $N = 5(\text{RD}) / 4 (\text{HFHS})$ ,  
692 Mann-Whitney test. Abbreviations: RD = regular diet, HFHS = high-fat high-sugar, ALT = alanine  
693 aminotransaminase. p-values are indicated where appropriate.

694  
695 **Figure 2. High-fat and high-sugar diet induces liver damage and systemic hyperlipidemia.**

696 Male Syrian hamsters were fed either a regular or high-fat high-sugar diet *ad libitum* and 5 animals  
697 from each group were sacrificed week 16 for analyses of liver tissue. **A.D.** Gross imaging of a  
698 representative liver from one hamster on the RD and one hamster on the HFHS diet regimen.  
699 **B.E.** 20x photomicrograph of H&E-stained slide. **C.F.** 400x photomicrograph of H&E-stained slide.  
700 **G.** RNA was isolated for gene expression analyses from liver tissue at 16 weeks. Using Integrated  
701 Pathway Analysis (Qiagen), significantly up-regulated canonical pathways were identified.  
702 Graphs show pathways associated with cell recruitment, activation, and immunological  
703 inflammation ( $p > 0.05$ , z-score  $< -2$  or  $> 2$ ). **H.** Integrated Pathway Analysis (Qiagen) was used  
704 to depict the gene network associated with nonalcoholic steatohepatitis. Symbols refer to legend  
705 below figure. Red: Gene upregulation in high-fat high-sugar animals as compared to regular diet  
706 animals. Green: downregulation in comparison to regular diet.

707  
708 **Figure 3: High-fat and high-sugar diet exasperated disease severity after SARS-COV-2**

709 **infection.** Male Syrian hamsters were fed either a regular or high-fat high-sugar diet *ad libitum*  
710 for 16 weeks, then challenged with  $8 \times 10^4$  TCID<sub>50</sub> SARS-CoV-2. **A.** Survival after challenge for RD  
711 ( $N = 10$ ) and HFHS ( $N = 9$ ) in the 14 and 21 DPI groups **B.** Relative weight loss in hamsters after  
712 challenge. Left graph shows median  $\pm$  95% CI. Right graph shows area under the curve (AUC,  
713 negative peaks only) between 1-14 DPI of surviving animals. Truncated violin plots depicting  
714 median, quartiles and individuals,  $N = 10 (\text{RD}) / 7 (\text{HFHS})$ , Mann-Whitney test. **C.** Lung function  
715 analysis after challenge **D.** Pressure-volume loops at pre-challenge, 7, 14, and 21 DPI.  
716 Abbreviations: RD = regular diet, HFHS = high-fat high-sugar, DPI = days post inoculation. p-  
717 values are indicated where appropriate.

718  
719 **Figure 4. High-fat and high-sugar diet is associated to increased pulmonary pathology and**  
720 **decreased viral clearance.** Animals were euthanized at 7 DPI with SARS-CoV-2 in order to  
721 compare lung pathology and viral titers. **A-J.** Gross and photomicrographic images of hamster  
722 lungs taken at 7 DPI. **A, F.** Gross necropsy findings consisted of multifocal well-circumscribed  
723 dark red foci throughout turgid lobes which failed to collapse. **B, G.** Dark red foci in the gross  
724 images correlate with the consolidated foci adjacent to airways and scattered along the pleural  
725 margin in the sub-gross images. HE, 1.4x. **C, H.** Foci of interstitial pneumonia adjacent to terminal  
726 bronchioles and accompanying blood vessels. HE, 20x. **D, I.** Pneumonia consists of alveoli  
727 containing neutrophils, eosinophils, alveolar and septal macrophages, fibrin, edema and septa  
728 lined by hyperplastic type II pneumocytes, HE 400x. Syncytial cells are common (see inset, HE,  
729 1000x). Pneumonic areas in the HFHS diet hamsters frequently had abundant intra-alveolar  
730 edema (\*) and organizing fibrin mixed with inflammatory cells. Note the vessel wall disrupted by  
731 sub-endothelial leukocytes and cellular debris (←). **E, J.** anti-SARS-CoV-2 immunoreactivity in  
732 the lungs from the regular diet hamsters is rare compared to the frequent pneumocyte  
733 immunoreactivity in the lungs of the HFHS diet hamsters, IHC, 400x. **K.** Individual pathological  
734 scores. **L.** Quantitative count of SARS-CoV-2 immunoreactivity by morphometric analysis.  
735 Truncated violin plots depicting median, quartiles and individuals, N = 10 (RD) / 4 (HFHS), Mann-  
736 Whitney test. **M.N.** Lung viral load measured by g and sgRNA. Truncated violin plots depicting  
737 median, quartiles and individuals, N = 10 (RD) / 4 (HFHS), Mann-Whitney test. **O.** Infectious virus  
738 measured by lung titration. Truncated violin plots depicting median, quartiles and individuals, N =  
739 10 (RD) / 4 (HFHS), Mann-Whitney test. Dotted line = limit of detection. Abbreviations: g =  
740 genomic, sg = subgenomic, DPI = days post inoculation, H&E = hematoxylin and eosin stain, IHC  
741 = immunohistochemistry. p-values are indicated where appropriate.

742  
743 **Figure 5. Immune infiltration and in the lung during acute-phase of infection and humoral**  
744 **immunity is not significantly affected by high-fat high-sugar diet.** Animals were euthanized

745 at 0, 7 and 14 DPI and the presence of SARS-CoV-2 antigen, T-cells, B-cells and macrophages  
746 investigated. **A, B.** Pre-challenge RD and HFHS diet hamster lungs. **G, H.** IBA1; **M, N.** CD3 and  
747 **S, T.** Pax5. **C, D.** Lungs at 7 DPI. **I, J.** IBA1; **O, P.** CD3 and **U, V** Pax 5. **E, F.** Lungs at 14 DPI.  
748 **K, L.** IBA1; **Q, R.** CD3 and **W, X.** Pax 5. **A-F** HE. All images 200x. Abbreviations: RD = regular  
749 diet, HFHS = high-fat high-sugar, DPI = days post inoculation.

750

751 **Figure 6. Disease manifestation is accompanied by prolonged viral shedding, systemic**  
752 **immune and metabolomic dysregulation after high-fat high-sugar diet.** Animals were  
753 euthanized pre-challenge, at 7, 14, and 21 DPI with SARS-CoV-2 and serum and lung tissue  
754 collected for immune and lipid mediator analyses. Oropharyngeal swabs were taken to assess  
755 respiratory shedding **A.B.** Lung infiltration of T-cells (CD3) and macrophages (IBA1) was  
756 quantified by morphometric analysis. Truncated violin plots depicting median, quartiles and  
757 individuals, pre-challenge and 14 DPI: N = 2, 7 DPI: N = 10 (RD) / 4 (HFHS), ordinary two-way  
758 ANOVA, followed by Turkey's multiple comparisons test. **C.** ELISA titers against spike protein of  
759 SARS-CoV-2 (lineage A) in serum obtained pre-challenge, at 7, 14, and 21 DPI. Truncated violin  
760 plots depicting median, quartiles and individuals, pre-challenge and 14 DPI: N = 5 (RD) / 4  
761 (HFHS), 7 DPI: N = 10 (RD) / 4 (HFHS), 21 DPI: N = 5 (RD) / 3 (HFHS), ordinary two-way ANOVA,  
762 followed by Sidak's multiple comparisons test. **D.** Virus neutralization titers against SARS-CoV-2  
763 (lineage A) in serum obtained at 14 and 21 DPI. Truncated violin plots depicting median quartiles  
764 and individuals, 14 DPI: N = 5 (RD) / 4 (HFHS), 21 DPI: N = 5 (RD) / 3 (HFHS), ordinary two-way  
765 ANOVA, followed by Sidak's multiple comparisons test. **E.F.** Viral load in oropharyngeal swabs  
766 measured in sgRNA copy number for RD and HFHS animals. Graphs show median, individual  
767 animals and 95% CI (shaded area). Dotted line = peak shedding. **G.** Area under the curve (AUC)  
768 analysis of virus shedding shown in E/F. Truncated violin plots depicting median quartiles and  
769 individuals, 21 DPI: N = 5 (RD) / 3 (HFHS), Mann-Whitney test. **H.** Serum levels (pg/mL) of INF-  
770  $\gamma$ , TNF $\alpha$ -, IL-6 and IL-10 measured by ELISA from serum collected on 0, 7, 14, and 21 DPI.

771 Truncated violin plots depicting median quartiles and individuals, pre-challenge/14 and 21 DPI: N  
772 = 5 (RD) / 4 (HFHS), 7 DPI: N = 10 (RD) / 4 (HFHS), ordinary two-way ANOVA, followed by  
773 Sidak's multiple comparisons test. I. Lipid time-course heatmap: Changes in PUFA-containing  
774 serum lipids associated with an active SARS-CoV-2 infection as measured by LC-MS/MS.  
775 Autoscaled intensities are displayed for serum lipids species that were significantly changed  
776 between 0 and 7 DPI in either regular diet or HFHS diet hamsters with a false discovery rate of  
777 15 % equating to  $p = 0.0256$ ,  $0.0193$  for RD and HFHS, respectively. \*FA22:6 (HFHS  $p = 0.0374$ )  
778 is displayed for comparison to clinical data despite not passing FDR filters. Abbreviations: TNF =  
779 tumor necrosis factor, IFN = interferon, IL = interleukin, RD = regular diet, HFHS = high -fat high-  
780 sugar, DPI = days post inoculation, sg = subgenomic, VN = virus neutralization. p-values are  
781 indicated where appropriate.  
782

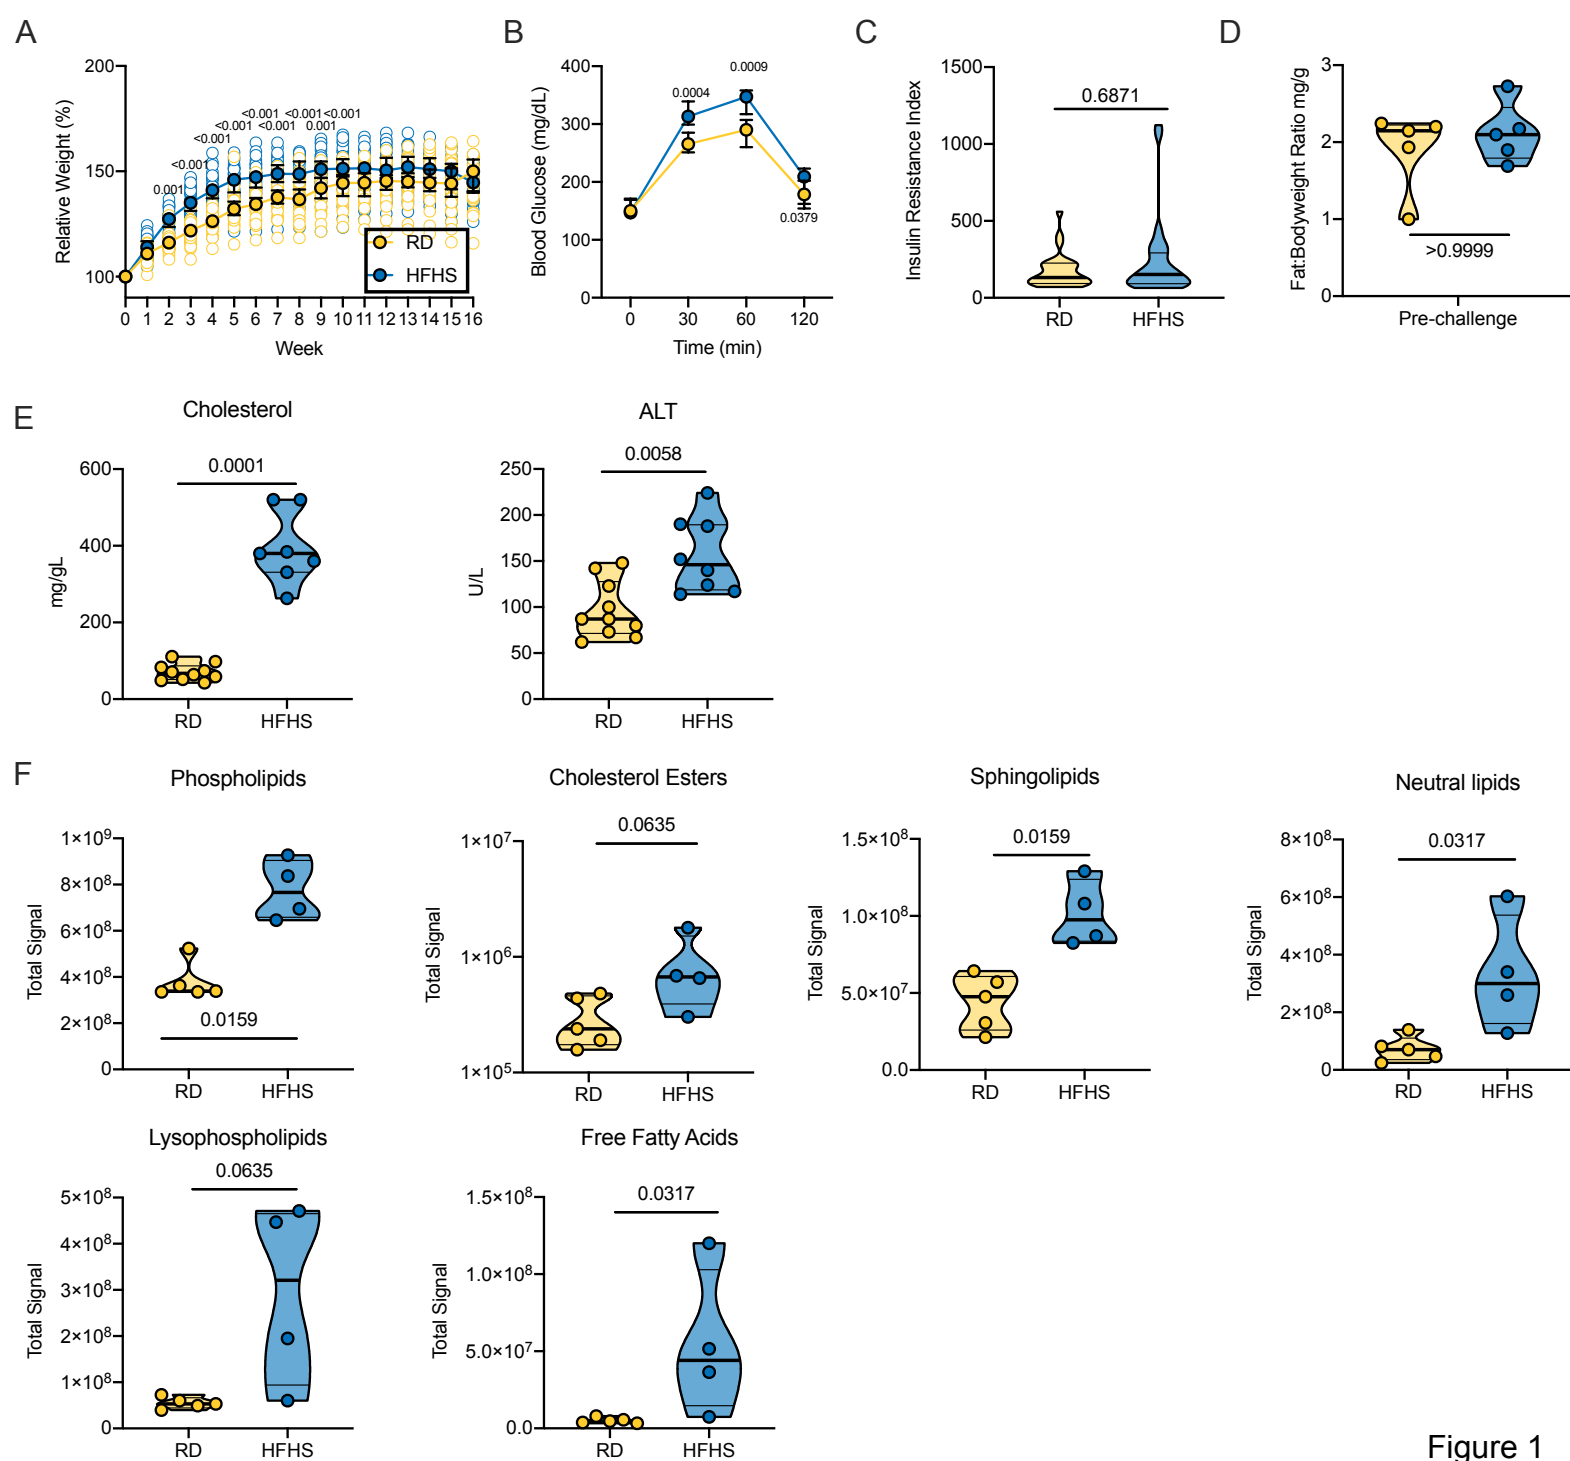

Figure 1

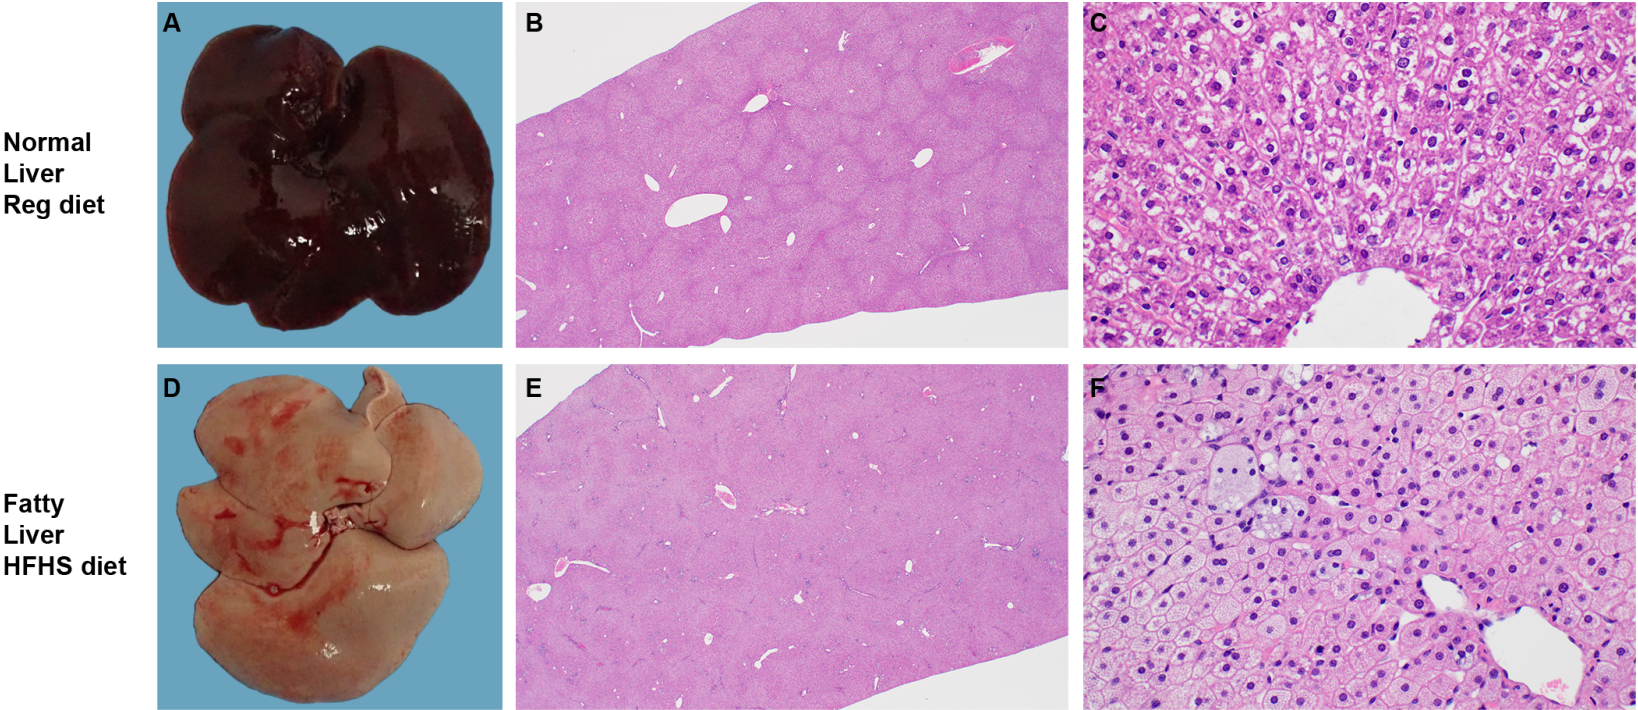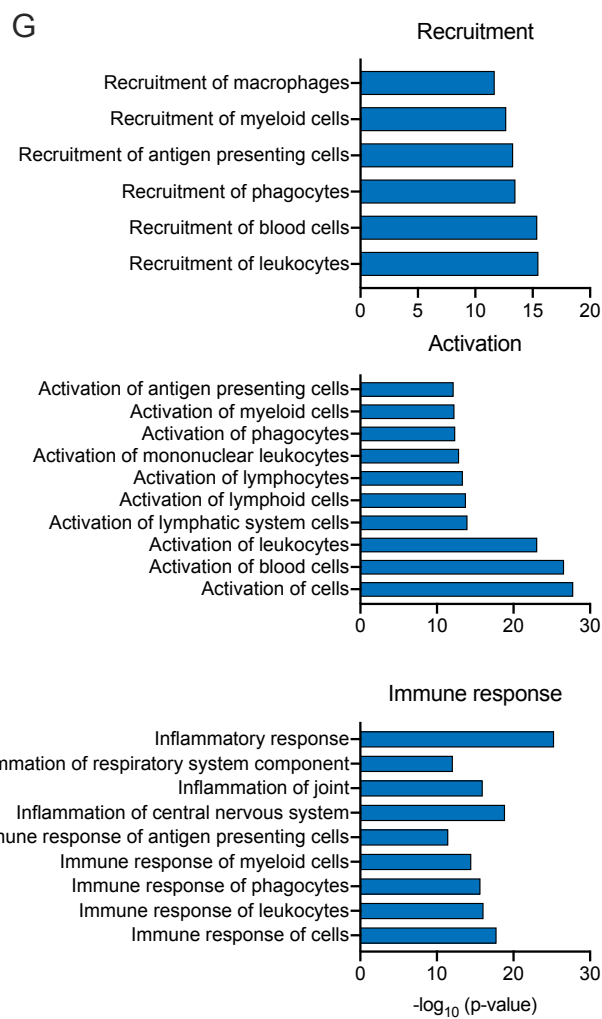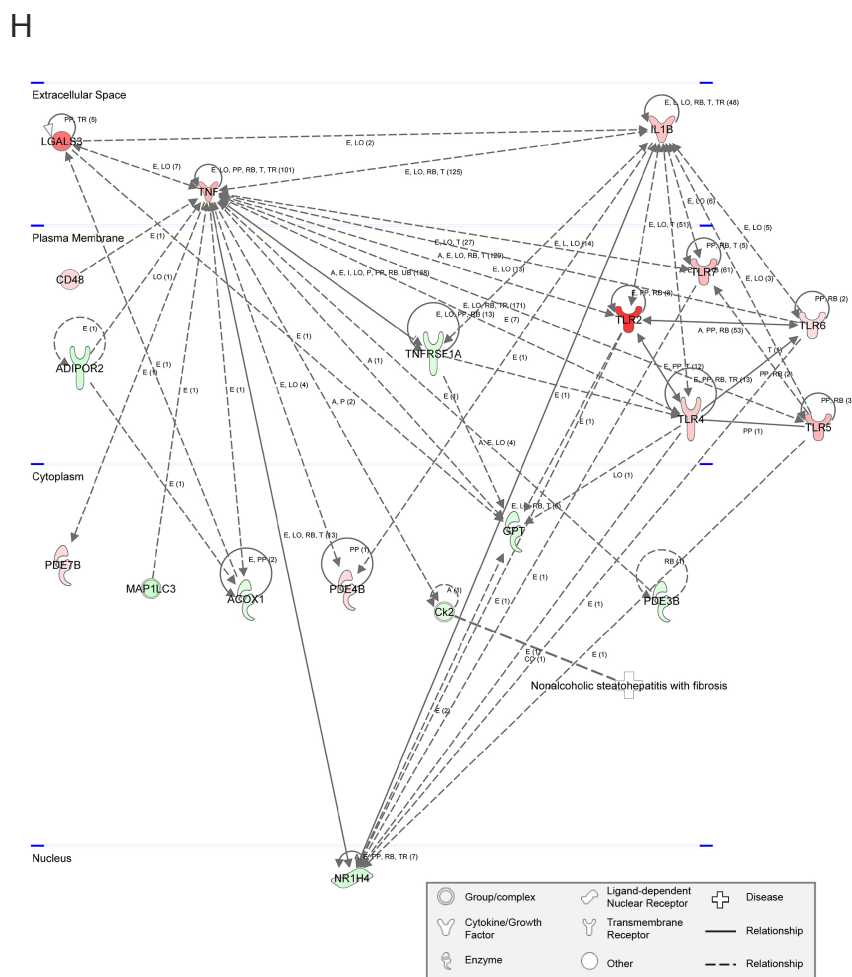

Figure 2

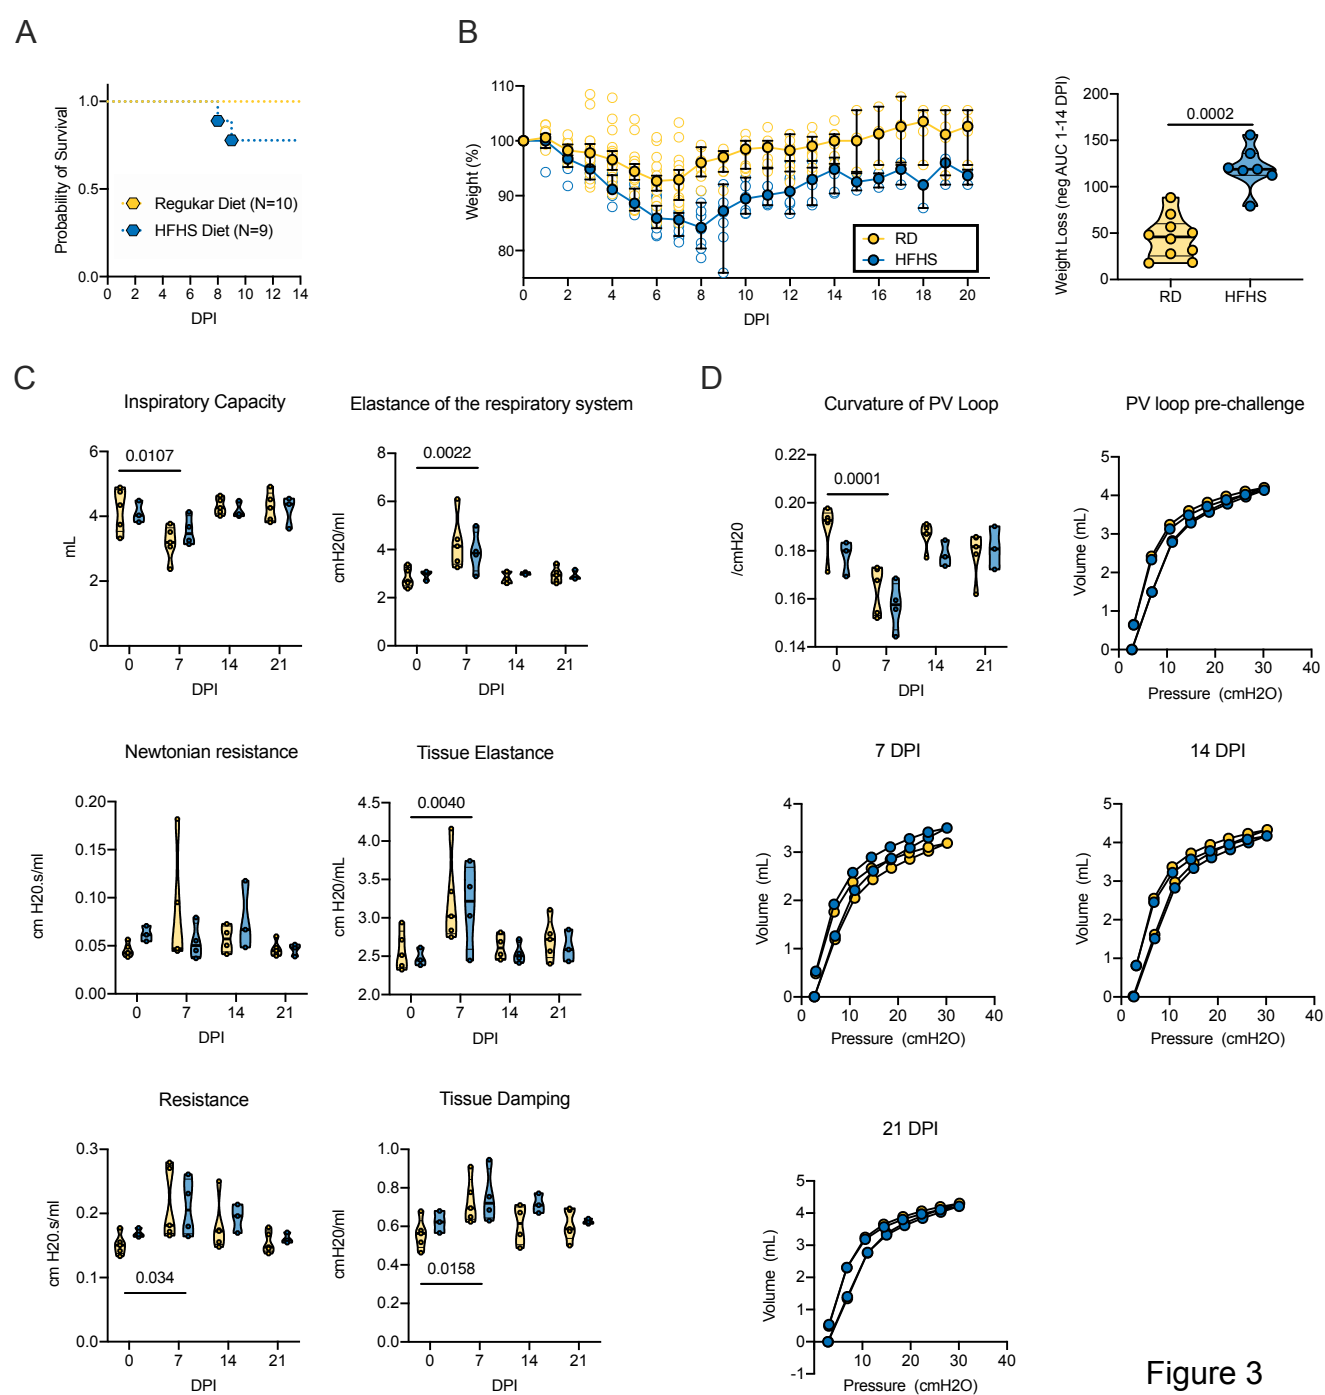

Figure 3



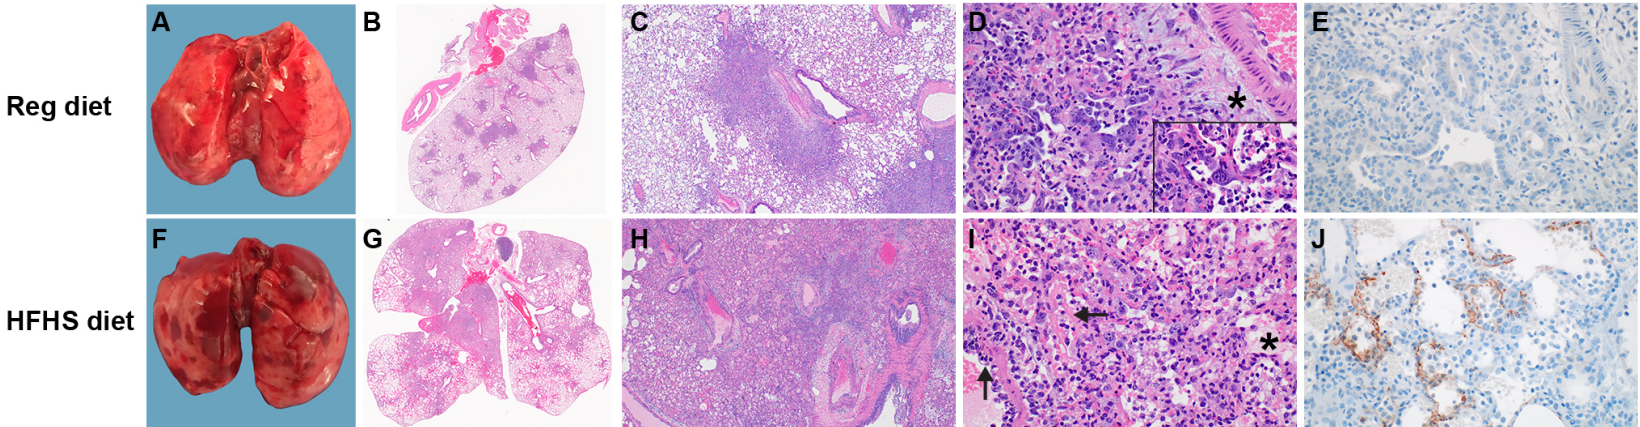

**K**

|                                              | RD 1 | RD 2 | RD 3 | RD 4 | RD 5 | RD 6 | RD 7 | RD 8 | RD 9 | RD 10 | HFHS 1 | HFHS 2 | HFHS 3 | HFHS 4 |
|----------------------------------------------|------|------|------|------|------|------|------|------|------|-------|--------|--------|--------|--------|
| Percentage affected                          | 70   | 30   | 20   | 30   | 40   | 70   | 50   | 40   | 60   | 60    | 70     | 60     | 50     | 30     |
| Interstitial Pneumonia                       | 4    | 2    | 2    | 3    | 3    | 4    | 3    | 3    | 4    | 4     | 4      | 3      | 3      | 2      |
| Syncytial Cell                               | 1    | 1    | 1    | 1    | 1    | 1    | 1    | 1    | 1    | 1     | 1      | 1      | 1      | 1      |
| Alveolar and bronchial exudate               | 3    | 2    | 2    | 2    | 2    | 3    | 3    | 3    | 3    | 3     | 4      | 4      | 4      | 3      |
| Bronchiolar epithelial cell inflamm/necrosis | 0    | 0    | 0    | 0    | 0    | 0    | 0    | 0    | 0    | 0     | 1      | 1      | 1      | 1      |
| Perivascular leukocyte cuffing               | 0    | 0    | 0    | 0    | 0    | 0    | 0    | 0    | 0    | 0     | 0      | 0      | 0      | 0      |
| vasculitis - neutrophilic                    | 2    | 2    | 1    | 1    | 2    | 1    | 1    | 1    | 2    | 2     | 3      | 3      | 3      | 2      |
| Type II pneumocyte hyperplasia               | 1    | 1    | 1    | 1    | 1    | 1    | 1    | 1    | 1    | 1     | 1      | 1      | 1      | 1      |
| Hemorrhage, fibrin and or edema              | 3    | 2    | 2    | 1    | 1    | 4    | 3    | 0    | 4    | 4     | 4      | 3      | 3      | 3      |

0 = No lesions  
 1 = Minimal (1-10%)  
 2 = Mild (11-25%)  
 3 = Moderate (26-50%)  
 4 = Marked (51-75%)  
 5 = Severe (76-100%)

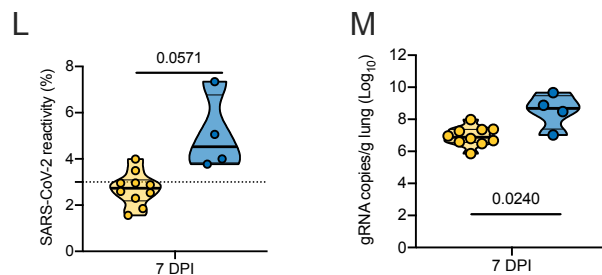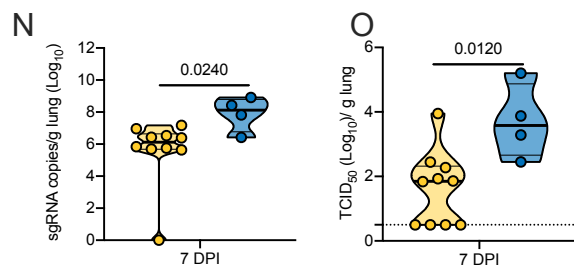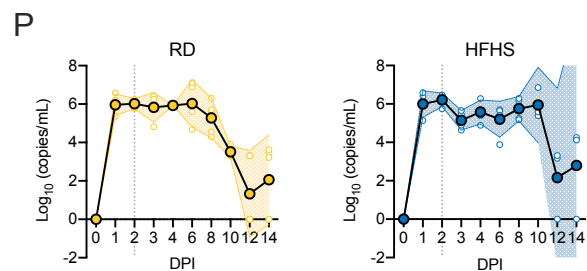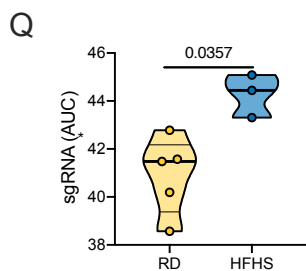

Figure 4

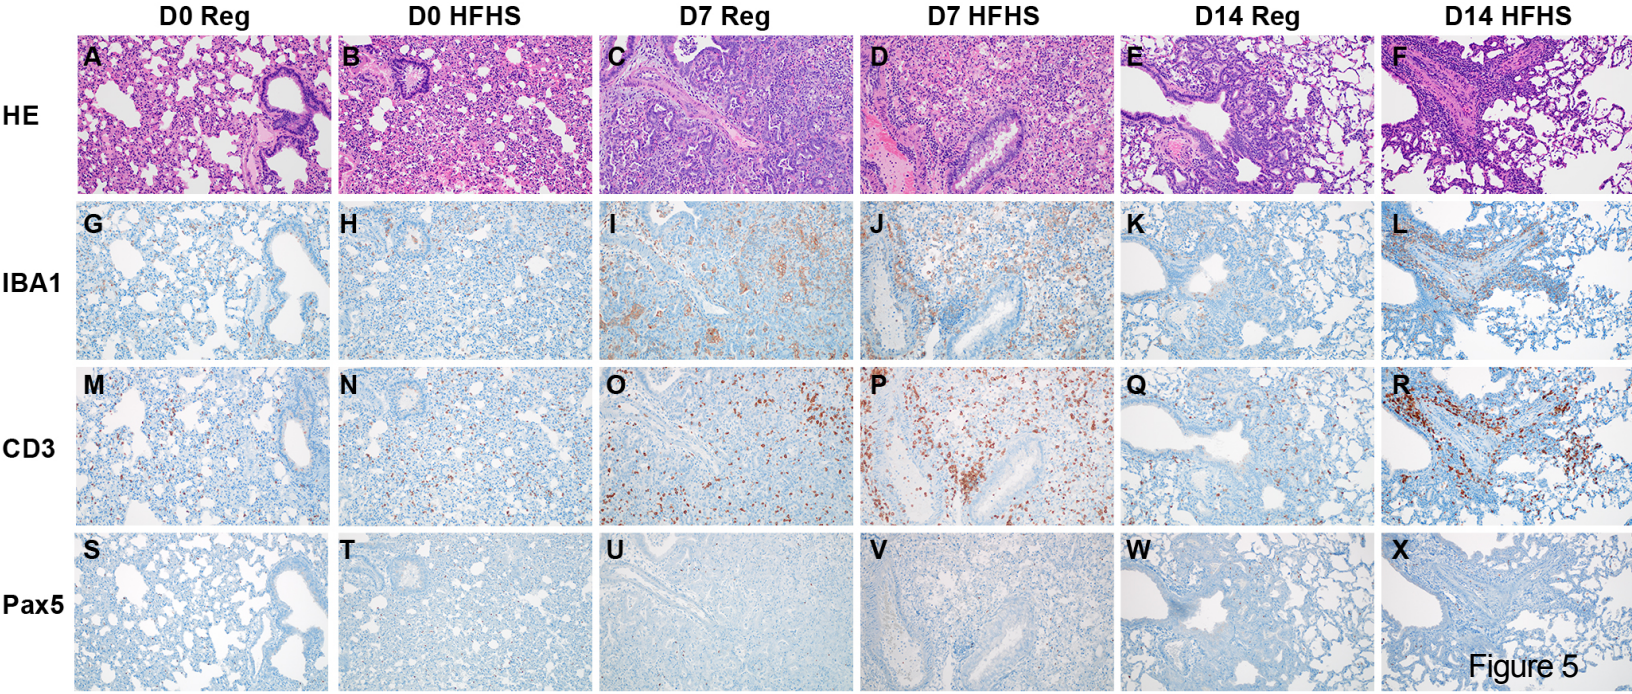

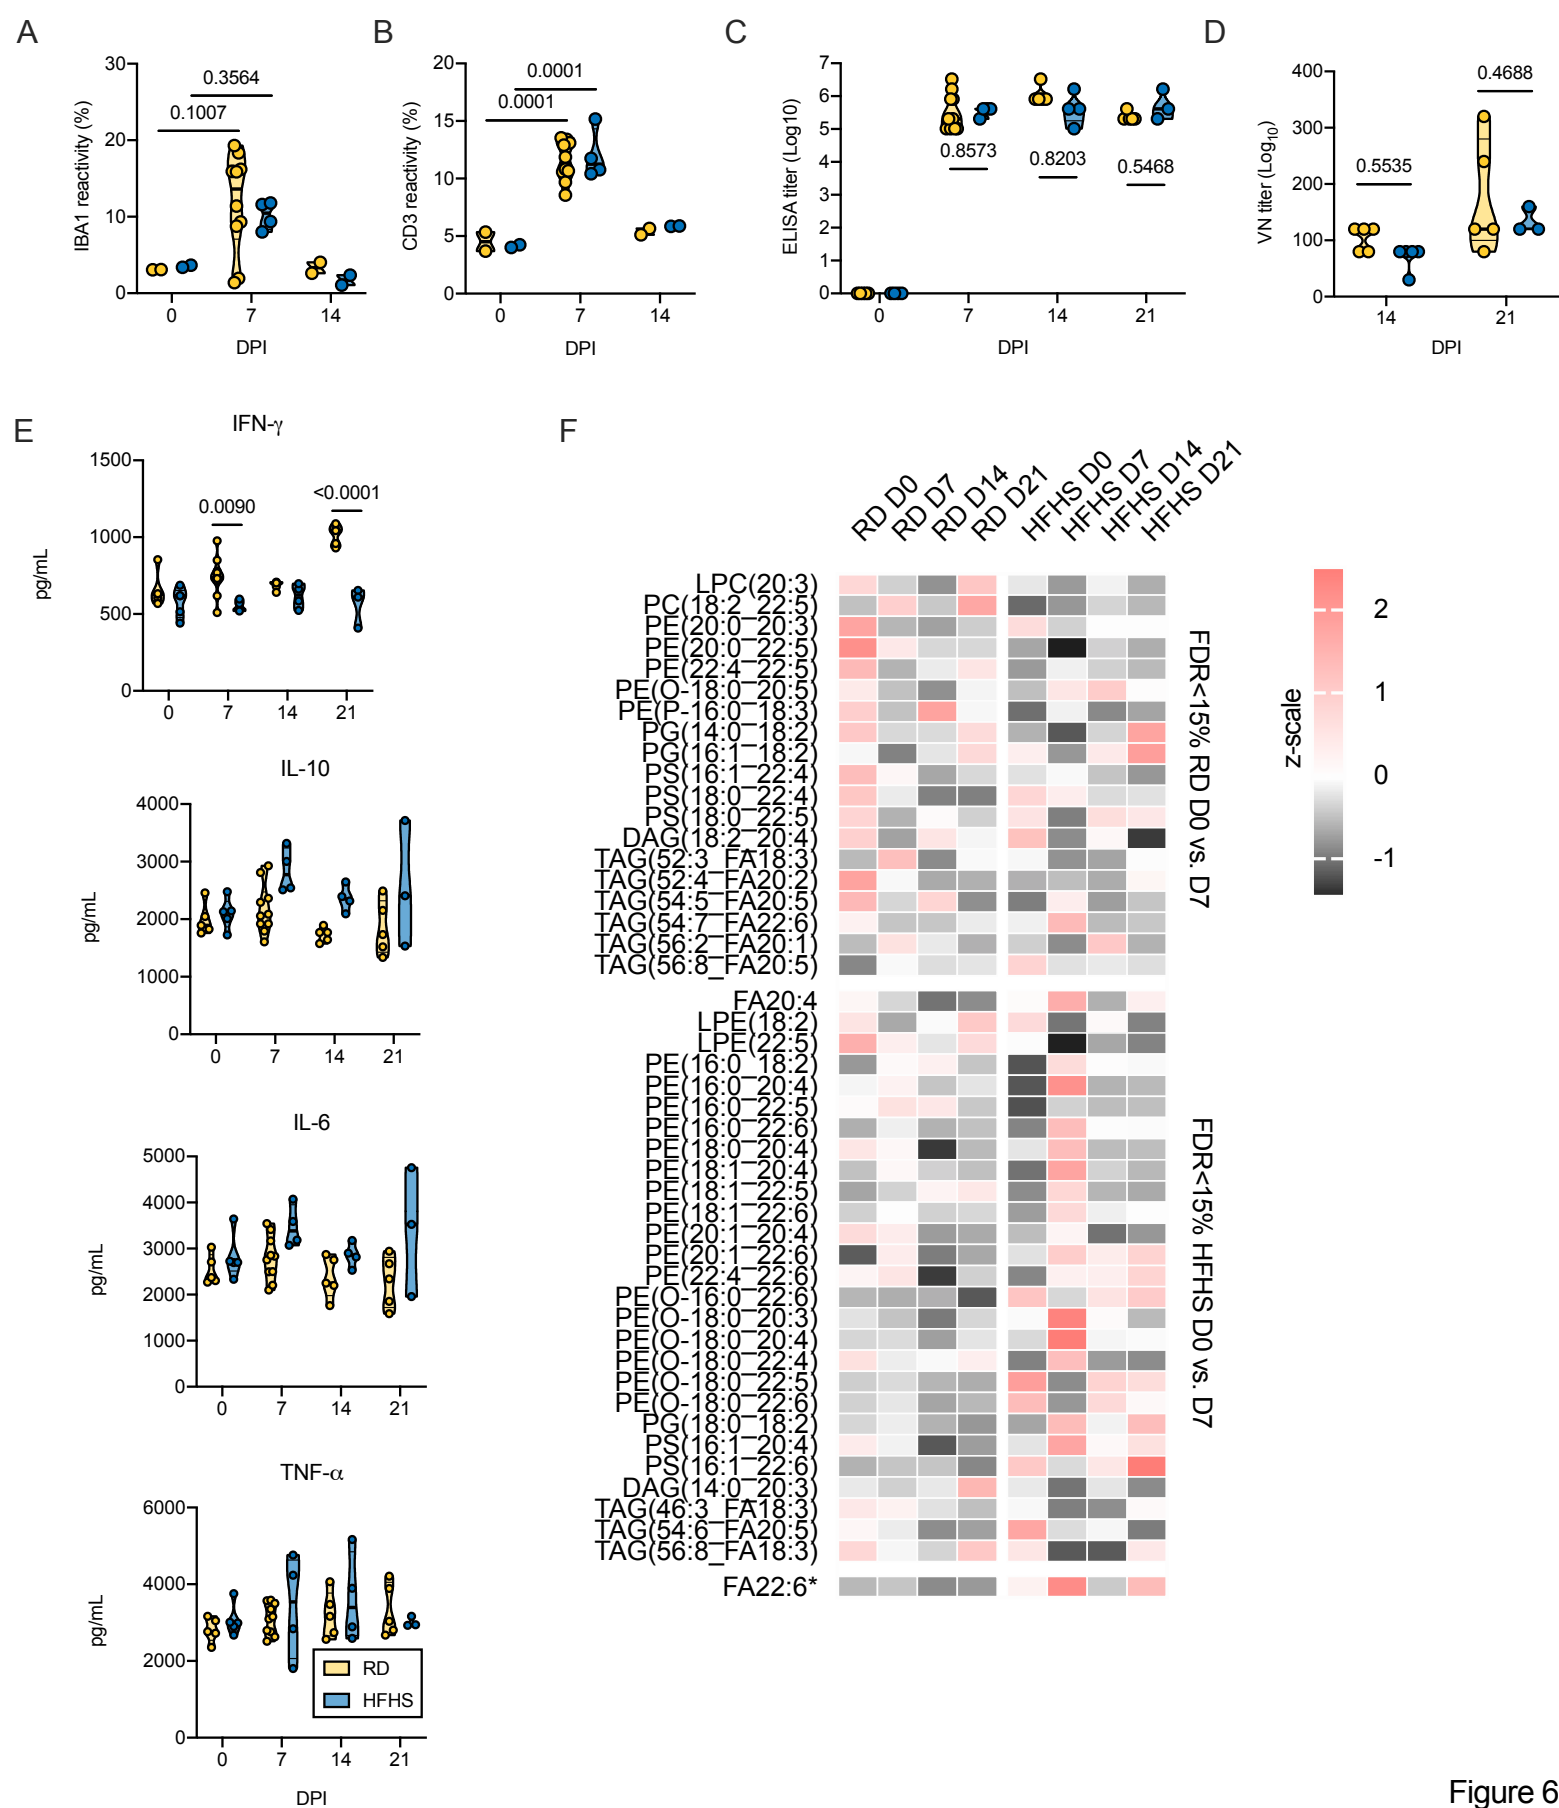

Figure 6

## Supplemental Material

### Western diet increases COVID-19 disease severity in the Syrian hamster

Julia R. Port<sup>1\*</sup>, Danielle R. Adney<sup>1\*</sup>, Benjamin Schwarz<sup>2</sup>, Jonathan E. Schulz<sup>1</sup>, Daniel E.

Sturdevant<sup>3</sup>, Brian J. Smith<sup>4</sup>, Victoria A. Avanzato<sup>1</sup>, Myndi G. Holbrook<sup>1</sup>, Jyothi N.

Purushotham<sup>1</sup>, Kaitlin A. Stromberg<sup>2</sup>, Ian Leighton<sup>2</sup>, Catharine M. Bosio<sup>2</sup>, Carl Shaia<sup>4</sup>, Vincent J.

Munster<sup>1#</sup>

1. Laboratory of Virology, National Institute of Allergy and Infectious Diseases, National Institutes of Health, Hamilton, MT, USA
2. Laboratory of Bacteriology, National Institute of Allergy and Infectious Diseases, National Institutes of Health, Hamilton, MT, USA
3. Genomics Unit, Research Technologies Branch, National Institute of Allergy and Infectious Diseases, National Institutes of Health, Hamilton, MT, USA
4. Rocky Mountain Veterinary Branch, Division of Intramural Research, National Institutes of Health, Hamilton, MT, USA

\*These authors contributed equally

#Corresponding author: Vincent Munster, email: [vincent.munster@nih.gov](mailto:vincent.munster@nih.gov)

**Supplemental Table 1: Liver marker profile in serum of regular diet (RD) and high-fat high-sugar diet (HFHS) after 16 weeks.** Quantitative determination of total cholesterol (CHOL), high-density lipoprotein cholesterol (HDL), triglycerides (TRIG), alanine aminotransferase (ALT), aspartate aminotransferase (AST), and glucose (GLU) in heparinized whole blood. From the CHOL, HDL and TRIG determinations, low-density lipoprotein cholesterol (LDL), very low-density lipoprotein cholesterol (VLDL), non-HDL cholesterol, and a total cholesterol/high-density lipoprotein cholesterol ratio (TC/H) was calculated. ~ + could not be calculated, LIP = not detectable due to lipid interference.

| Animal ID  | Chol<br>mg/dl | HDL<br>mg/dl | Trig<br>mg/dl | ALT<br>U/L | AST<br>U/L | GLU<br>mg/d<br>l | nHD<br>Lc<br>mg/d<br>l | TC/<br>H | LDL<br>mg/d<br>l | VLD<br>L<br>mg/d<br>l | LIP |
|------------|---------------|--------------|---------------|------------|------------|------------------|------------------------|----------|------------------|-----------------------|-----|
| HFHS.1     | 360           | LIP          | ~~~           | 124        | 78         | 120              | ~~~                    | ~~~      | LIP              | LIP                   | 3   |
| HFHS.2     | >520          | HEM          | HEM           | 224        | HEM        | LIP              | ~~~                    | ~~~      | ~~~              | ~~~                   | 3   |
| HFHS.3     | ~~~           | HEM          | ~~~           | 140        | HEM        | LIP              | ~~~                    | ~~~      | ~~~              | ~~~                   | 3   |
| HFHS.4     | >520          | HEM          | HEM           | 190        | HEM        | LIP              | ~~~                    | ~~~      | ~~~              | ~~~                   | 3   |
| HFHS.5     | 380           | LIP          | >500          | 117        | 82         | 114              | ~~~                    | ~~~      | LIP              | LIP                   | 3   |
| HFHS.6     | 263           | LIP          | >500          | 152        | 86         | 110              | ~~~                    | ~~~      | LIP              | LIP                   | 3   |
| HFHS.7     | 384           | ~~~          | ~~~           | 188        | 147        | LIP              | ~~~                    | ~~~      | ~~~              | ~~~                   | 3   |
| HFHS.8     | 331           | LIP          | >500          | 114        | 84         | 59               | ~~~                    | ~~~      | LIP              | LIP                   | 2   |
| Regular.1  | 83            | 49           | 212           | 62         | 76         | 113              | 34c                    | 1.7c     | 0                | 42c                   | 1   |
| Regular.2  | 52            | 31           | 168           | 100        | 152        | 151              | 21c                    | 1.7c     | 0                | 34c                   | 0   |
| Regular.3  | 98            | 68           | 248           | 67         | 79         | 72               | 30c                    | 1.4c     | 0                | 50c                   | 0   |
| Regular.4  | 111           | 92           | 252           | 87         | 87         | 79               | 19c                    | 1.2c     | ~~~              | 50c                   | 1   |
| Regular.5  | 74            | 43           | 184           | 73         | 96         | 98               | 31c                    | 1.7c     | 0                | 37c                   | 1   |
| Regular.6  | 59            | 32           | 201           | 87         | 113        | 119              | 27c                    | 1.8c     | 0                | 40c                   | 1   |
| Regular.7  | 43            | 23           | 204           | 148        | 127        | 101              | 20c                    | 1.8c     | ~~~              | 41c                   | 0   |
| Regular.8  | 71            | 42           | 198           | 80         | 88         | 85               | 29c                    | 1.7c     | 0                | 40c                   | 0   |
| Regular.9  | 64            | 46           | 232           | 142        | 157        | 88               | 18c                    | 1.4c     | ~~~              | 46c                   | 0   |
| Regular.10 | 49            | 28           | 251           | 123        | 166        | 99               | 21c                    | 1.7c     | ~~~              | 50c                   | 0   |

**Supplemental Table 2:** Up-and down-regulated pathways in livers pre-challenge organized by disease and function.

| <b>Diseases or Functions Annotation</b>      | <b>p-value</b> | <b>Predicted Activation State</b> | <b>Activation z-score</b> | <b># Molecules</b> |
|----------------------------------------------|----------------|-----------------------------------|---------------------------|--------------------|
| Development of genitourinary system          | 2.07E-11       | Increased                         | 2.114                     | 160                |
| Internalization of cells                     | 1.99E-11       | Increased                         | 5.333                     | 63                 |
| Abnormal bone density                        | 1.99E-11       | Decreased                         | -2.297                    | 50                 |
| Phagocytosis of blood cells                  | 1.89E-11       | Increased                         | 4.815                     | 52                 |
| Adhesion of lymphocytes                      | 1.54E-11       | Increased                         | 3.747                     | 34                 |
| Interaction of T lymphocytes                 | 1.36E-11       | Increased                         | 3.906                     | 39                 |
| Adhesion of lymphatic system cells           | 1.33E-11       | Increased                         | 3.839                     | 35                 |
| Cell movement of macrophages                 | 1.32E-11       | Increased                         | 4.236                     | 65                 |
| Adhesion of tumor cell lines                 | 9.66E-12       | Increased                         | 2.42                      | 68                 |
| Pancreatobiliary tumor                       | 9.07E-12       | Increased                         | 2.146                     | 402                |
| Size of body                                 | 9.03E-12       | Increased                         | 2.966                     | 126                |
| Cell cycle progression                       | 8.08E-12       | Increased                         | 2.341                     | 171                |
| Binding of T lymphocytes                     | 7.98E-12       | Increased                         | 3.521                     | 37                 |
| Interaction of lymphocytes                   | 5.70E-12       | Increased                         | 3.973                     | 45                 |
| Pancreatic lesion                            | 5.57E-12       | Increased                         | 2.114                     | 358                |
| Migration of neutrophils                     | 5.56E-12       | Increased                         | 3.941                     | 38                 |
| Response of myeloid leukocytes               | 5.43E-12       | Increased                         | 2.565                     | 34                 |
| Chemotaxis of neutrophils                    | 5.10E-12       | Increased                         | 2.328                     | 42                 |
| Migration of granulocytes                    | 4.82E-12       | Increased                         | 3.2                       | 43                 |
| Cell-cell contact                            | 4.15E-12       | Increased                         | 2.864                     | 136                |
| Development of head                          | 3.98E-12       | Increased                         | 3.325                     | 164                |
| Quantity of metal ion                        | 3.75E-12       | Increased                         | 2.912                     | 85                 |
| Aggregation of blood platelets               | 3.23E-12       | Increased                         | 3.084                     | 49                 |
| Immune response of antigen presenting cells  | 3.23E-12       | Increased                         | 3.968                     | 49                 |
| Binding of lymphatic system cells            | 2.58E-12       | Increased                         | 3.801                     | 45                 |
| Transmigration of leukocytes                 | 2.57E-12       | Increased                         | 2.603                     | 42                 |
| Binding of lymphocytes                       | 2.47E-12       | Increased                         | 3.619                     | 43                 |
| Transport of molecule                        | 2.41E-12       | Increased                         | 2.741                     | 246                |
| Malignant connective or soft tissue neoplasm | 2.36E-12       | Increased                         | 2.079                     | 203                |
| Response of antigen presenting cells         | 1.93E-12       | Increased                         | 4.049                     | 52                 |
| Recruitment of macrophages                   | 1.92E-12       | Increased                         | 2.61                      | 33                 |

|                                              |          |           |        |     |
|----------------------------------------------|----------|-----------|--------|-----|
| Engulfment of cells                          | 1.87E-12 | Increased | 4.959  | 99  |
| Phagocytosis                                 | 1.52E-12 | Increased | 5.163  | 81  |
| Homing of neutrophils                        | 1.47E-12 | Increased | 2.328  | 43  |
| Phagocytosis of cells                        | 1.45E-12 | Increased | 5.586  | 75  |
| Binding of endothelial cells                 | 1.13E-12 | Increased | 2.496  | 49  |
| Transmigration of cells                      | 1.13E-12 | Increased | 2.844  | 49  |
| Cell movement of cancer cells                | 8.81E-13 | Increased | 2.68   | 41  |
| Interaction of endothelial cells             | 8.80E-13 | Increased | 2.389  | 50  |
| Cellular infiltration by myeloid cells       | 8.74E-13 | Increased | 2.023  | 72  |
| Inflammation of respiratory system component | 7.19E-13 | Increased | 2.017  | 105 |
| Binding of lymphoid cells                    | 7.09E-13 | Increased | 3.713  | 44  |
| Activation of antigen presenting cells       | 6.15E-13 | Increased | 3.438  | 70  |
| Homeostasis of blood cells                   | 5.80E-13 | Increased | 3.757  | 111 |
| Activation of myeloid cells                  | 4.67E-13 | Increased | 3.734  | 74  |
| Degranulation of phagocytes                  | 4.12E-13 | Increased | 3.533  | 90  |
| Activation of phagocytes                     | 3.71E-13 | Increased | 3.826  | 79  |
| Engulfment of myeloid cells                  | 3.71E-13 | Increased | 4.655  | 47  |
| Degranulation of myeloid cells               | 3.58E-13 | Increased | 3.647  | 91  |
| Synthesis of reactive oxygen species         | 2.88E-13 | Increased | 4.241  | 99  |
| Homeostasis of leukocytes                    | 2.75E-13 | Increased | 3.757  | 110 |
| Malignant neoplasm of retroperitoneum        | 2.37E-13 | Increased | 2.021  | 419 |
| Quantity of Ca <sup>2+</sup>                 | 2.14E-13 | Increased | 2.613  | 82  |
| Engulfment of leukocytes                     | 2.00E-13 | Increased | 4.233  | 51  |
| Recruitment of myeloid cells                 | 1.80E-13 | Increased | 4.402  | 64  |
| T cell development                           | 1.58E-13 | Increased | 3.822  | 104 |
| Degranulation of leukocytes                  | 1.56E-13 | Increased | 3.4    | 95  |
| Upper gastrointestinal tract tumor           | 1.49E-13 | Increased | 2.236  | 581 |
| Invasion of cells                            | 1.48E-13 | Increased | 4.617  | 184 |
| Engulfment of phagocytes                     | 1.43E-13 | Increased | 4.266  | 49  |
| Cell movement of tumor cell lines            | 1.37E-13 | Increased | 4.127  | 185 |
| Metabolism of reactive oxygen species        | 1.34E-13 | Increased | 4.381  | 104 |
| Growth of connective tissue                  | 1.31E-13 | Increased | 2.459  | 123 |
| Amyloidosis                                  | 1.30E-13 | Decreased | -2.433 | 116 |
| Activation of mononuclear leukocytes         | 1.19E-13 | Increased | 3.257  | 95  |

|                                         |          |           |       |     |
|-----------------------------------------|----------|-----------|-------|-----|
| Upper gastrointestinal tract cancer     | 1.13E-13 | Increased | 2     | 580 |
| Lymphopoiesis                           | 9.10E-14 | Increased | 3.693 | 123 |
| Adhesion of mononuclear leukocytes      | 7.27E-14 | Increased | 3.616 | 42  |
| Quantity of immunoglobulin              | 6.65E-14 | Increased | 3.038 | 63  |
| Production of antibody                  | 6.01E-14 | Increased | 3.204 | 66  |
| Cell viability                          | 5.81E-14 | Increased | 4.969 | 235 |
| Phagocytosis of phagocytes              | 4.62E-14 | Increased | 4.14  | 46  |
| Phagocytosis of leukocytes              | 4.60E-14 | Increased | 4.229 | 47  |
| Recruitment of antigen presenting cells | 4.55E-14 | Increased | 3.038 | 38  |
| Phagocytosis of myeloid cells           | 3.83E-14 | Increased | 4.396 | 46  |
| Activation of lymphocytes               | 3.64E-14 | Increased | 3.171 | 93  |
| Cell movement of T lymphocytes          | 3.42E-14 | Increased | 3.59  | 63  |
| Recruitment of phagocytes               | 3.01E-14 | Increased | 4.827 | 62  |
| Cell survival                           | 1.69E-14 | Increased | 4.795 | 247 |
| Activation of lymphoid cells            | 1.50E-14 | Increased | 3.25  | 94  |
| Migration of myeloid cells              | 1.43E-14 | Increased | 3.972 | 54  |
| Production of protein                   | 1.43E-14 | Increased | 3.73  | 70  |
| Quantity of B lymphocytes               | 1.29E-14 | Increased | 2.549 | 81  |
| Activation of lymphatic system cells    | 1.09E-14 | Increased | 3.088 | 95  |
| Metastasis                              | 1.03E-14 | Increased | 3.523 | 181 |
| Interaction of mononuclear leukocytes   | 9.60E-15 | Increased | 3.685 | 55  |
| Growth of epithelial tissue             | 7.66E-15 | Increased | 2.312 | 135 |
| Quantity of T lymphocytes               | 7.33E-15 | Increased | 4.155 | 111 |
| T cell homeostasis                      | 7.05E-15 | Increased | 3.667 | 109 |
| Hematopoiesis of mononuclear leukocytes | 6.16E-15 | Increased | 3.759 | 132 |
| Migration of antigen presenting cells   | 4.15E-15 | Increased | 3.735 | 51  |
| Immediate hypersensitivity              | 4.06E-15 | Increased | 2.362 | 77  |
| Response of myeloid cells               | 3.82E-15 | Increased | 4.283 | 60  |
| Immune response of myeloid cells        | 2.85E-15 | Increased | 4.069 | 56  |
| Non-colon gastrointestinal cancer       | 2.59E-15 | Increased | 2     | 612 |
| Aggregation of cells                    | 2.51E-15 | Increased | 3.773 | 77  |
| Extraadrenal retroperitoneal tumor      | 2.51E-15 | Increased | 2.58  | 463 |
| Chemotaxis of myeloid cells             | 2.36E-15 | Increased | 3.493 | 70  |
| Leukopoiesis                            | 2.22E-15 | Increased | 4.158 | 149 |



|                                           |          |           |        |     |
|-------------------------------------------|----------|-----------|--------|-----|
| Aggregation of blood cells                | 1.69E-15 | Increased | 3.56   | 62  |
| Differentiation of mononuclear leukocytes | 1.67E-15 | Increased | 3.796  | 134 |
| Hereditary connective tissue disorder     | 1.43E-15 | Decreased | -3.259 | 128 |
| Binding of mononuclear leukocytes         | 1.33E-15 | Increased | 3.331  | 54  |
| Advanced malignant tumor                  | 8.44E-16 | Increased | 3.434  | 197 |
| Connective tissue tumor                   | 7.45E-16 | Increased | 2.495  | 222 |
| Advanced stage tumor                      | 5.25E-16 | Increased | 3.434  | 198 |
| Chemotaxis of phagocytes                  | 4.47E-16 | Increased | 3.987  | 73  |
| Recruitment of blood cells                | 4.05E-16 | Increased | 4.395  | 79  |
| Connective or soft tissue tumor           | 3.53E-16 | Increased | 2.525  | 249 |
| Degranulation of cells                    | 3.26E-16 | Increased | 3.573  | 115 |
| Recruitment of leukocytes                 | 2.92E-16 | Increased | 4.208  | 78  |
| Chemotaxis of leukocytes                  | 2.63E-16 | Increased | 4.146  | 84  |
| Immune response of phagocytes             | 2.22E-16 | Increased | 4.017  | 62  |
| Growth of tumor                           | 2.05E-16 | Increased | 4.005  | 179 |
| Degranulation                             | 1.09E-16 | Increased | 3.507  | 117 |
| Inflammation of joint                     | 1.07E-16 | Increased | 3.397  | 178 |
| Response of phagocytes                    | 9.69E-17 | Increased | 4.268  | 66  |
| Chemotaxis of blood cells                 | 9.45E-17 | Increased | 4.147  | 85  |
| Recruitment of cells                      | 8.37E-17 | Increased | 4.692  | 85  |
| T cell migration                          | 7.55E-17 | Increased | 4.271  | 73  |
| Immune response of leukocytes             | 7.50E-17 | Increased | 4.727  | 80  |
| Hypersensitive reaction                   | 6.65E-17 | Increased | 3.831  | 97  |
| Vasculogenesis                            | 5.92E-17 | Increased | 3.35   | 158 |
| Angiogenesis                              | 5.56E-17 | Increased | 4.04   | 184 |
| Development of vasculature                | 4.93E-17 | Increased | 3.955  | 198 |
| Binding of tumor cell lines               | 4.04E-17 | Increased | 2.518  | 93  |
| Homing of leukocytes                      | 3.51E-17 | Increased | 4.4    | 89  |
| Cell movement of antigen presenting cells | 2.39E-17 | Increased | 4.024  | 91  |
| Binding of myeloid cells                  | 2.30E-17 | Increased | 3.053  | 60  |
| Cellular homeostasis                      | 2.19E-17 | Increased | 4.676  | 269 |
| Experimental autoimmune encephalomyelitis | 1.82E-17 | Increased | 3.58   | 86  |
| Homing of blood cells                     | 1.80E-17 | Increased | 4.405  | 90  |
| Interaction of tumor cell lines           | 1.57E-17 | Increased | 2.283  | 96  |
| Microtubule dynamics                      | 6.51E-18 | Increased | 3.927  | 216 |
| Cell movement of granulocytes             | 5.63E-18 | Increased | 3.593  | 93  |

|                                          |          |           |        |     |
|------------------------------------------|----------|-----------|--------|-----|
| Cell movement of lymphatic system cells  | 2.90E-18 | Increased | 4.135  | 101 |
| Organization of cytoplasm                | 2.90E-18 | Increased | 4.437  | 262 |
| Cell movement of neutrophils             | 2.55E-18 | Increased | 3.635  | 83  |
| Encephalitis                             | 2.39E-18 | Increased | 2.541  | 95  |
| Immune response of cells                 | 1.57E-18 | Increased | 4.854  | 130 |
| Cell movement of lymphocytes             | 1.14E-18 | Increased | 4.249  | 100 |
| Allergy                                  | 5.20E-19 | Increased | 3.26   | 98  |
| Rheumatic Disease                        | 4.02E-19 | Increased | 3.322  | 223 |
| Organismal death                         | 3.96E-19 | Decreased | -4.3   | 362 |
| Morbidity or mortality                   | 2.66E-19 | Decreased | -4.307 | 366 |
| Cell proliferation of T lymphocytes      | 2.10E-19 | Increased | 2.415  | 127 |
| Development of body trunk                | 1.36E-19 | Increased | 3.651  | 215 |
| Binding of professional phagocytic cells | 1.35E-19 | Increased | 2.925  | 61  |
| Inflammation of central nervous system   | 1.33E-19 | Increased | 2.333  | 102 |
| Invasive tumor                           | 1.09E-19 | Increased | 3.538  | 224 |
| Migration of lymphatic system cells      | 8.48E-20 | Increased | 4.544  | 95  |
| Lymphocyte migration                     | 5.97E-20 | Increased | 4.62   | 94  |
| Organization of cytoskeleton             | 5.36E-20 | Increased | 4.437  | 249 |
| Chemotaxis                               | 4.82E-20 | Increased | 4.815  | 123 |
| Migration of mononuclear leukocytes      | 3.71E-20 | Increased | 4.931  | 99  |
| Proliferation of lymphocytes             | 3.65E-20 | Increased | 3.292  | 150 |
| Proliferation of immune cells            | 3.58E-20 | Increased | 3.303  | 158 |
| Proliferation of lymphatic system cells  | 3.30E-20 | Increased | 3.653  | 159 |
| Homing of cells                          | 2.85E-20 | Increased | 4.933  | 128 |
| Interaction of phagocytes                | 2.61E-20 | Increased | 3.318  | 64  |
| Quantity of lymphatic system cells       | 1.12E-20 | Increased | 4.27   | 161 |
| Proliferation of blood cells             | 8.94E-21 | Increased | 2.84   | 172 |
| Migration of phagocytes                  | 7.21E-21 | Increased | 5.059  | 82  |
| Proliferation of mononuclear leukocytes  | 3.68E-21 | Increased | 3.384  | 154 |
| Quantity of lymphocytes                  | 1.41E-21 | Increased | 4.164  | 155 |
| Cell movement of mononuclear leukocytes  | 7.82E-22 | Increased | 4.793  | 119 |
| Quantity of lymphoid cells               | 7.71E-22 | Increased | 4.267  | 156 |
| Cell movement of myeloid cells           | 9.41E-23 | Increased | 5.148  | 136 |
| Atherosclerosis                          | 5.83E-23 | Increased | 2.673  | 111 |

|                                      |          |           |       |      |
|--------------------------------------|----------|-----------|-------|------|
| Arteriosclerosis                     | 5.55E-23 | Increased | 2.673 | 112  |
| Cancer of cells                      | 5.08E-23 | Increased | 2.324 | 684  |
| Occlusion of artery                  | 8.44E-24 | Increased | 2.291 | 124  |
| Activation of leukocytes             | 7.41E-24 | Increased | 3.906 | 152  |
| Quantity of mononuclear leukocytes   | 3.21E-24 | Increased | 4.23  | 166  |
| Development of digestive organ tumor | 2.85E-24 | Increased | 2.223 | 805  |
| Occlusion of blood vessel            | 1.78E-24 | Increased | 2.439 | 127  |
| Cell movement of phagocytes          | 2.32E-25 | Increased | 5.16  | 143  |
| Vaso-occlusion                       | 1.80E-25 | Increased | 2.762 | 130  |
| Inflammatory response                | 5.12E-26 | Increased | 4.721 | 179  |
| Neoplasia of cells                   | 4.32E-26 | Increased | 3.343 | 764  |
| Nervous system neoplasm              | 1.09E-26 | Increased | 2.631 | 863  |
| Binding of leukocytes                | 6.17E-27 | Increased | 4.377 | 107  |
| Adhesion of immune cells             | 3.52E-27 | Increased | 4.659 | 102  |
| Activation of blood cells            | 2.67E-27 | Increased | 4.18  | 171  |
| Binding of blood cells               | 1.99E-28 | Increased | 4.151 | 117  |
| Activation of cells                  | 1.77E-28 | Increased | 4.235 | 212  |
| Adhesion of blood cells              | 1.50E-29 | Increased | 4.576 | 110  |
| Cell movement of leukocytes          | 2.69E-31 | Increased | 5.68  | 193  |
| Leukocyte migration                  | 2.22E-31 | Increased | 6.163 | 217  |
| Quantity of cells                    | 2.80E-32 | Increased | 4.371 | 346  |
| Migration of cells                   | 2.28E-33 | Increased | 5.915 | 387  |
| Quantity of leukocytes               | 8.59E-34 | Increased | 3.627 | 215  |
| Quantity of blood cells              | 1.14E-34 | Increased | 3.879 | 234  |
| Cell movement                        | 1.12E-34 | Increased | 6.237 | 422  |
| Digestive organ tumor                | 2.14E-45 | Increased | 2.245 | 1243 |
| Intraabdominal organ tumor           | 1.16E-50 | Increased | 2.485 | 1285 |
| Cancer                               | 3.98E-60 | Increased | 3.984 | 1378 |
| Solid tumor                          | 1.91E-61 | Increased | 2.377 | 1380 |
| Malignant solid tumor                | 6.41E-62 | Increased | 2.227 | 1377 |
| Non-melanoma solid tumor             | 2.74E-65 | Increased | 2.163 | 1366 |

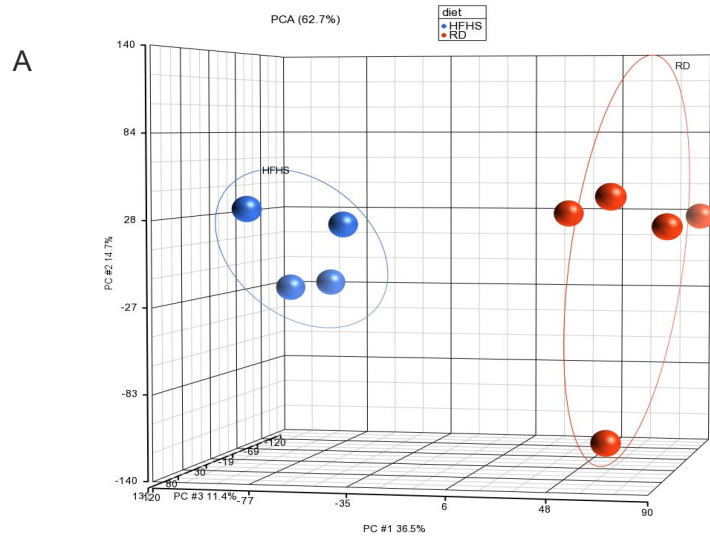

**Supplemental Figure 1: A.** RNA was isolated for gene expression analyses from liver tissue at 16 weeks and principal component analysis performed. Colors refer to legend on top. Abbreviations: RD = regular diet, HFHS = high-fat high-sugar, PC = principal component.

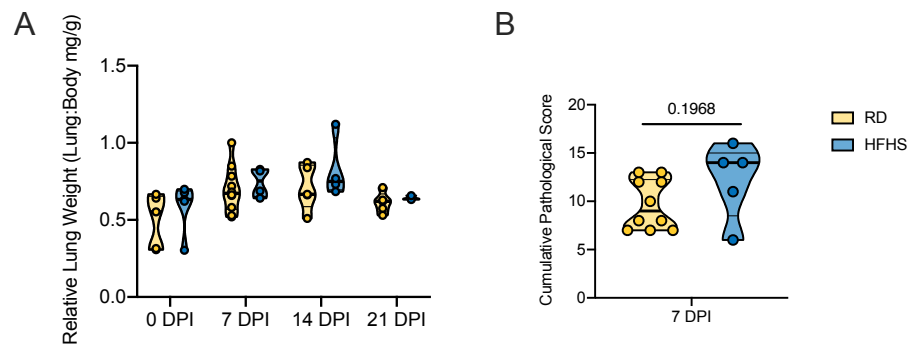

**Supplemental Figure 2:** Male Syrian hamsters were fed either a regular or high-fat high-sugar diet *ad libitum* for 16 weeks, then challenged with  $8 \times 10^4$  TCID<sub>50</sub> SARS-CoV-2. Animals were euthanized pre-challenge (0 DPI), at 7, 14 and 21 DPI. **A.** Lung weights. Truncated violin plots depicting median, quartiles, and individuals. **B.** Cumulative pathology score of lung tissues collected at 7 DPI. Truncated violin plots depicting median, quartiles and individuals, N = 10 (RD) / 4 (HFHS), Mann-Whitney test. Abbreviations: RD = regular diet, HFHS = high-fat high-sugar. p-values are indicated where appropriate.

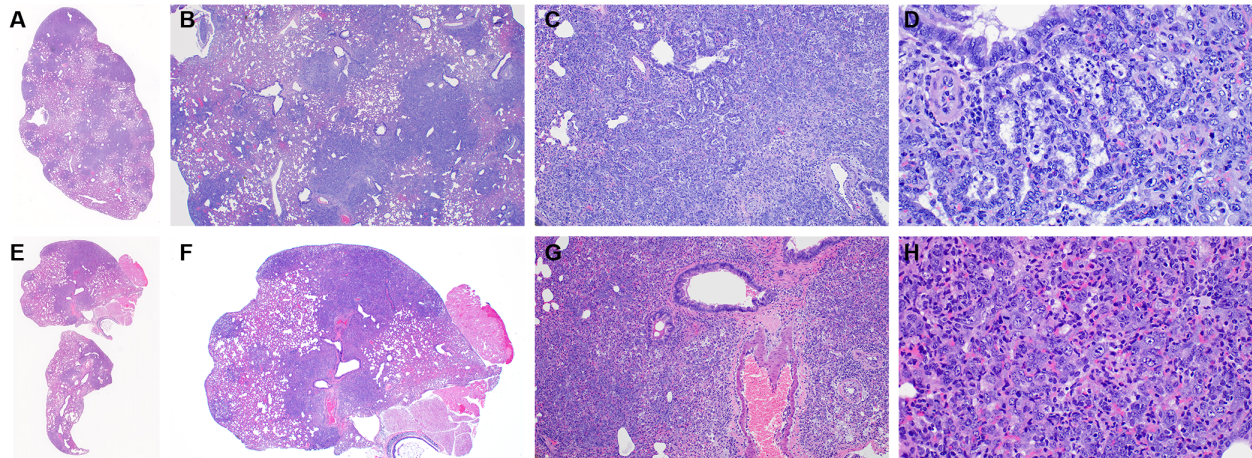

**Supplemental Figure 3:** Male Syrian hamsters were fed either a regular or high-fat high-sugar diet *ad libitum* for 16 weeks, then challenged with  $8 \times 10^4$  TCID<sub>50</sub> SARS-CoV-2. Animals were euthanized at day 8 and 9 due to increased weight loss. **A, E.** Dark, discreet foci identify areas of pneumonia; lighter areas indicate hemorrhage, edema, inflammation. HE, 1.4x. **B, F.** Although approximately 100% of the lobe is affected, only 50% contains discreet foci of interstitial pneumonia, HE, 20x. **C, D.** Examples of organized type II pneumocyte hyperplasia giving a honeycomb appearance. HE, 100x, 400x. **G, H.** Less well organized foci with more congestion, edema, and inflammation. HE, 100x, 400x. Of note, both appearances overlap and can be present in the same animal.

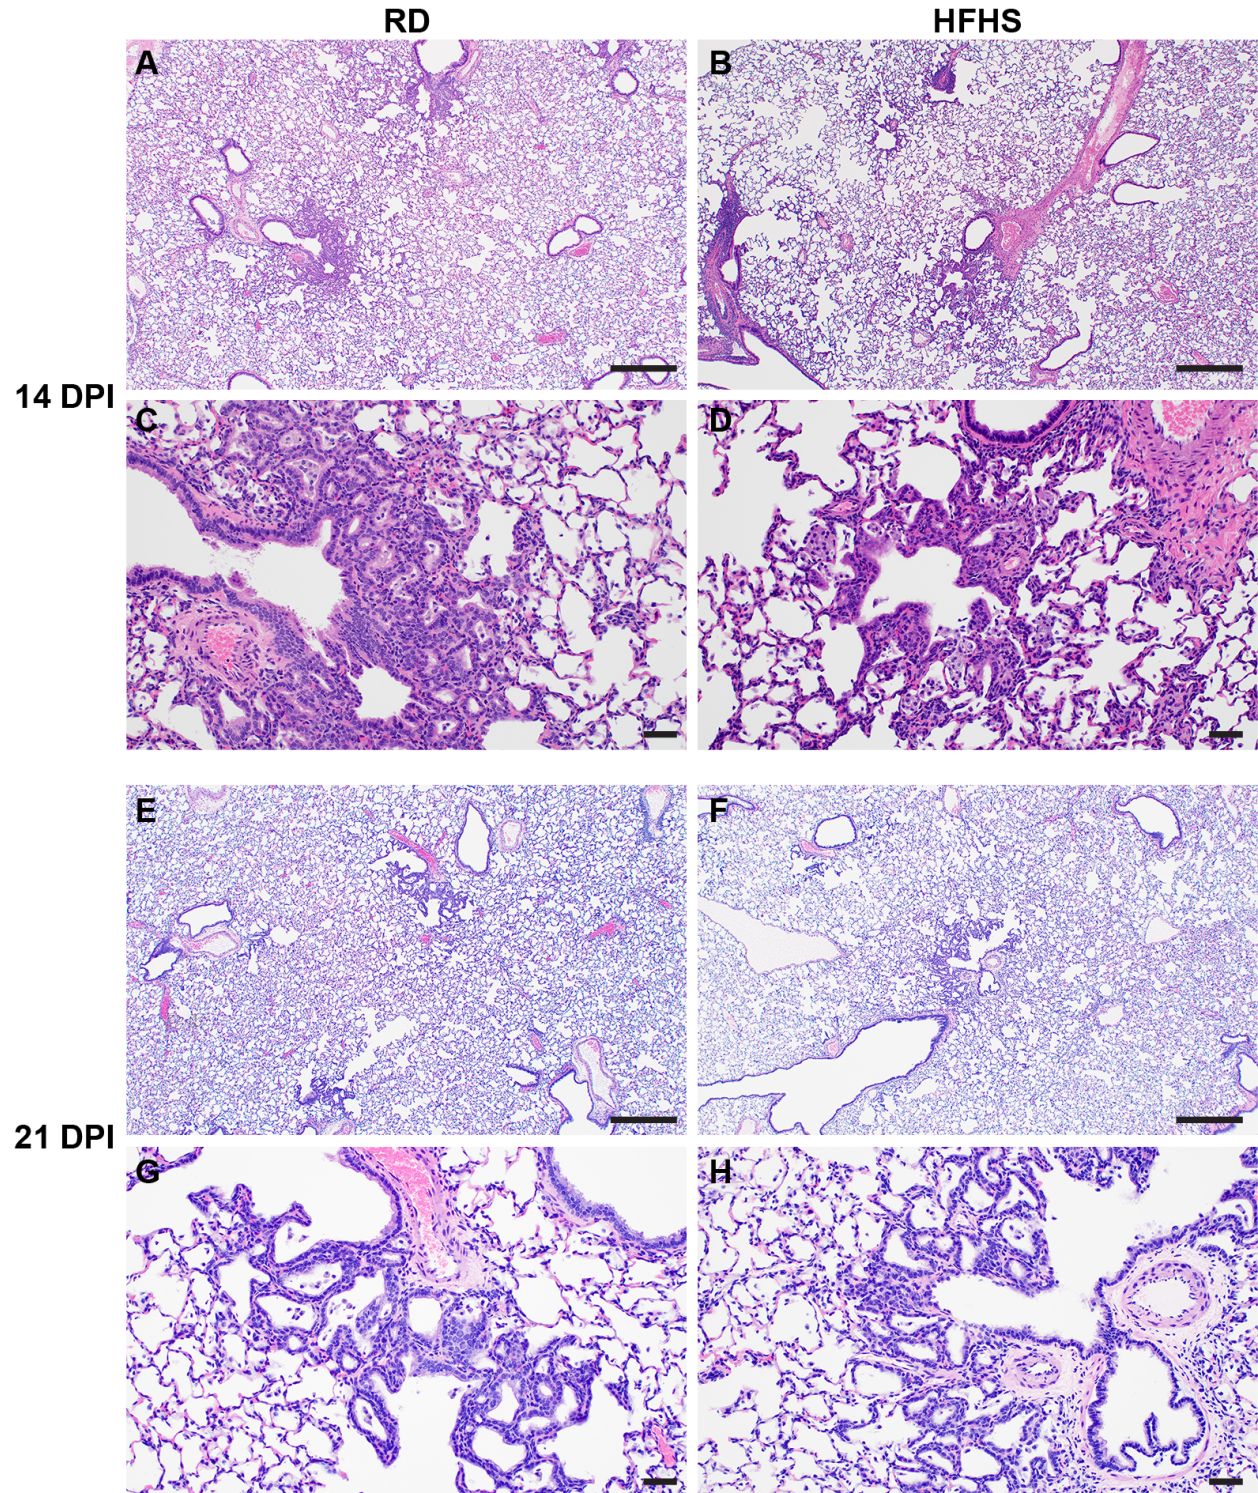

**Supplemental Figure 4:** Male Syrian hamsters were fed either a regular or high-fat high-sugar diet *ad libitum* for 16 weeks, then challenged with  $8 \times 10^4$  TCID<sub>50</sub> SARS-CoV-2. Lung tissues were collected 14 and 21 days post inoculation. **A, B.** 14 DPI, Lesions located at terminal bronchioles.

HE, 40x. **C, D.** 14 DPI, Thickened septa, alveolar bronchiolization and minimal inflammation. HE, 400x. **E, F.** 21 DPI, Lesions appear indistinguishable. HE, 40x. **G, H.** 21 DPI, Thickened septa and alveolar bronchiolization remain. HE, 400x. Abbreviations: Reg = regular diet, HFHS = high-fat high-sugar, DPI = days post inoculation.

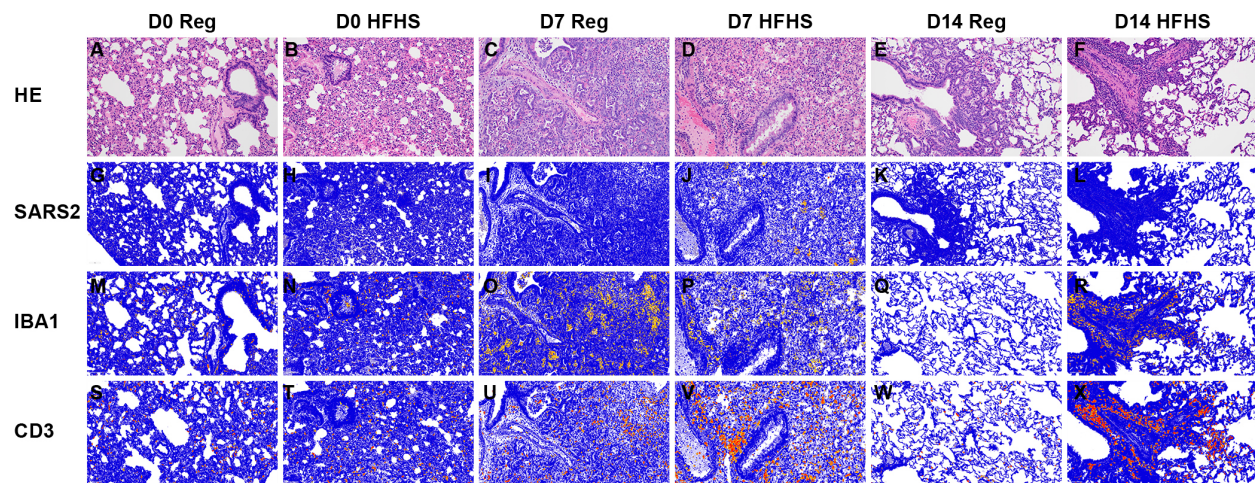

**Supplemental Figure 5:** Male Syrian hamsters were fed either a regular or high-fat high-sugar diet *ad libitum* for 16 weeks, then challenged with  $8 \times 10^4$  TCID<sub>50</sub> SARS-CoV-2. Animals were euthanized pre-challenge (0 DPI), 7 and 14 days post inoculation. Serial images of lungs. **A-F.** Pre-challenge lungs appear normal, 7 DPI lungs are pneumonic, and 14 DPI lungs appear to be resolving. HE, 200x. **G-L.** Positive pixel image of IHC staining against N protein of SARS-CoV-2. Note the positive pixels at 7 DPI in the HFHS image, 200x. **M-P.** Positive pixel image of IHC staining against IBA1. Note the increase in positive pixels at 7 and 14 DPI for both the RD and HFHS samples, 200x. **Q-X.** Positive pixel image of IHC staining against CD3, Note the increase in positive pixels at 7 and 14 DPI for both the RD and HFHS samples, 200x. Positive pixel = orange. Abbreviations: Reg = regular diet, HFHS = high-fat high-sugar, DPI = days post inoculation.
